1 **Title:** Genetic mapping reveals *Pou2af2*-dependent tuning of tuft cell differentiation and  
2 intestinal type 2 immunity

3

4 **Authors:** Marija S. Nadsombati<sup>1</sup>, Natalie Niepoth<sup>2,3</sup>, Lily M. Webeck<sup>1</sup>, Elizabeth A.  
5 Kennedy<sup>4</sup>, Danielle L. Jones<sup>1</sup>, Megan T. Baldrige<sup>4</sup> Andres Bendesky<sup>2,3</sup>, Jakob von  
6 Moltke<sup>1\*</sup>

7

8 **Affiliations:**

9

10 1 Department of Immunology, University of Washington School of Medicine, Seattle,  
11 Washington, USA.

12

13 2 Zuckerman Mind Brain Behavior Institute, Columbia University, New York, USA

14

15 3 Department of Ecology Evolution and Environmental Biology, Columbia University,  
16 New York, USA

17

18 4 Department of Medicine, Division of Infectious Diseases, Edison Family Center for  
19 Genome Sciences & Systems Biology, Washington University School of Medicine, St.  
20 Louis, Missouri, USA.

21

22 \* Correspondence and lead contact: [jmoltke@uw.edu](mailto:jmoltke@uw.edu)

23

24

25

26

27

28

29

30

31

32

33

34

35

36

37

38

39 **Abstract**

40 Chemosensory epithelial tuft cells contribute to innate immunity at barrier  
41 surfaces, but their differentiation from epithelial progenitors is not well understood. Here  
42 we exploited differences between inbred mouse strains to identify an epithelium-intrinsic  
43 mechanism that regulates tuft cell differentiation and tunes innate type 2 immunity in the  
44 small intestine. Balb/cJ (Balb) mice had fewer intestinal tuft cells than C57BL/6J (B6)  
45 mice and failed to respond to the tuft cell ligand succinate. A majority of this differential  
46 succinate response was determined by a single genetic locus from 50-67Mb on  
47 chromosome 9 (Chr9). Congenic Balb mice carrying the B6 Chr9 locus had elevated  
48 baseline numbers of tuft cells and responded to succinate. The Chr9 locus  
49 includes *Pou2af2*, a transcriptional cofactor essential for tuft cell development. Epithelial  
50 crypts expressed a previously unannotated short isoform of *Pou2af2* that uses a novel  
51 transcriptional start site and encodes a non-functional protein. Low tuft cell numbers and  
52 the resulting lack of succinate response in Balb mice was explained by a preferential  
53 expression of the short isoform. Physiologically, differential *Pou2af2* isoform usage  
54 tuned innate type 2 immunity in the small intestine. Balb mice maintained  
55 responsiveness to helminth pathogens while ignoring commensal *Tritrichomonas*  
56 protists and reducing norovirus burdens.

57

58 **One Sentence Summary:** Genetic mapping identifies *Pou2af2* isoform usage as a  
59 novel regulator of tuft cell differentiation that tunes intestinal innate type 2 immunity.

60

61 **Main Text:**

62

63 **Introduction**

64 Tuft cells are rare chemosensory epithelial cells that are activated by apical  
65 environmental cues and transmit signals to neighboring epithelial cells and the  
66 underlying tissue. They can be found in most mucosal barriers of mice and humans,  
67 including those of the upper airways, stomach, biliary tree, intestines, and urethra(1).  
68 There are also tuft cells in the medullary thymic epithelium(2, 3). Tuft cells in all tissues

69 are defined by an apical “tuft” of long microvilli and share a transcriptional signature that  
70 includes genes also required for taste transduction (*Trpm5*, *Plcb2*, *Gnat3*) and genes  
71 associated with effector functions (*Alox5*, *Chat*, *Il25*, *Ptgs1*)(4, 5). Although tuft cells  
72 were discovered more than 60 years ago, it wasn’t until the last ten years that studies  
73 uncovered their contributions to innate immunity at barrier tissues.

74 The function and ontogeny of tuft cells are perhaps best understood in the small  
75 intestine (SI), where they are one of five post-mitotic lineages of epithelial cells that  
76 comprise the SI lining. SI epithelial cells are replenished every 4-5 days from a pool of  
77 intestinal stem cells (ISCs) that reside in the crypts of the SI (6). The cell intrinsic  
78 signals that direct tuft cell differentiation remain poorly understood, although the  
79 transcription factor POU2F3 is absolutely necessary for tuft cell differentiation and  
80 dispensable for all other epithelial lineages (7). Progenitor cells also integrate complex  
81 environmental cues that influence their differentiation into each of the five epithelial cell  
82 types. The homeostatic cues that direct tuft cell differentiation are unknown, but in mice  
83 free of specific pathogens including *Tritrichomonas* protists, tuft cells are rare (~1% of  
84 the epithelium). On the other hand, in mice infected with helminths or colonized with  
85 *Tritrichomonas* protists, interleukin 13 (IL-13) signaling through IL-4RA and STAT6 in  
86 epithelial progenitors is necessary and sufficient to induce a 5-10 fold increase in tuft  
87 cell frequency (hyperplasia) (7–10).

88 SI tuft cells detect the presence of helminths and *Tritrichomonas* protists using a  
89 signaling pathway related to taste transduction in the tongue (9). The ligand and  
90 receptor required for helminth sensing remain unknown, but Tritrichomonads are  
91 sensed via secretion of the metabolite succinate, which binds to its receptor (SUCNR1)  
92 on tuft cells(5, 11, 12). Once activated, tuft cells produce the cytokine interleukin 25 (IL-  
93 25) and, in some contexts, lipid-derived cysteinyl leukotrienes (cysLTs) to directly  
94 activate group 2 innate lymphoid cells (ILC2s) in the SI lamina propria (SILP)(7–9, 13).  
95 ILC2s in turn produce the canonical type 2 cytokines IL-5, -9, and -13, which collectively  
96 regulate hallmarks of type 2 immunity, including eosinophilia, hyperresponsivity of  
97 smooth muscle, and mucus overproduction. Meanwhile, the IL-13-induced tuft cell  
98 hyperplasia establishes a feed-forward tuft-ILC2 circuit. Tuft-ILC2 circuit activation can  
99 promote helminth clearance, but the function of tuft cell hyperplasia during

100 *Tritrichomonas* colonization remains unclear as these protists are acquired from parents  
101 post-partum and persist for the life of the mouse(7–9).

102 The tuft-ILC2 circuit is regulated differently in the proximal (i.e. duodenum +  
103 proximal jejunum) and distal (i.e. distal jejunum + ileum) ends of the SI. Helminths that  
104 primarily reside in the proximal SI, such as *Nippostrongylus brasiliensis* (*Nb*) and  
105 *Heligmosomoides polygyrus* (*Hp*), induce both IL-25 and cysLTs to elicit stronger tuft-  
106 ILC2 activation in the proximal SI compared to the distal SI(13). Conversely, succinate  
107 activation of the tuft-ILC2 circuit is cysLT-independent and occurs most strongly in the  
108 distal SI, where *Sucnr1* expression is highest and protists are more abundant(12, 13).  
109 Even when succinate is provided in the drinking water, and therefore is at its highest  
110 concentration in the proximal SI, tuft cell hyperplasia predominates in the distal SI(5).

111 Studying different inbred strains of mice has provided insight into mechanisms of  
112 type 2 immunity. In particular, seminal studies using *Leishmania major* infection  
113 established the notion that CD4<sup>+</sup> T helper cell responses in Balb/cJ (Balb) mice are type  
114 2 biased, while C57BL/6J (B6) mice are type 1 biased(14, 15). Such biases have  
115 similarly been noted in the SI, where Balb mice clear some helminth infections, such as  
116 *Hp* and *Strongyloides ratti*, more efficiently than B6 mice(16, 17). There are many  
117 proposed mechanisms for these differences, including intestinal microbiota composition,  
118 regulatory T cell function, and strength of T helper 2 cell (Th2) activation(16, 18, 19).  
119 Some studies have used genetic mapping to identify loci associated with strain-specific  
120 immune responses, but no single gene is responsible for the observed phenotypes(20,  
121 21). Likely these differences arise from a complex network of genetic and environmental  
122 differences all contributing to the phenotypic outcomes. Whether tuft cells and the SI  
123 tuft-ILC2 circuit are differentially regulated across mouse strains has not been  
124 examined.

125 Here we find that Balb mice have fewer tuft cells than B6 mice in many tissues  
126 and fail to activate the tuft-ILC2 circuit following succinate treatment in the SI. These  
127 differences are determined by a single genetic locus that regulates tuft cell  
128 differentiation and tunes the sensitivity and kinetics of innate type 2 immunity in the SI.

129  
130

131

132

## 133 **Results**

### 134 **Balb mice have fewer intestinal tuft cells and do not respond to succinate**

135         Given that Balb mice have been described as “type 2 skewed”, but nearly all tuft  
136 cell studies have been performed in B6 mice, we set out to compare tuft cell frequency  
137 and function between B6 and Balb mice. Balb mice were previously reported to have  
138 fewer tuft cells than B6 in the distal SI(22), and we found this discrepancy extended  
139 throughout the intestinal tract (Fig. 1A-B, fig. S1A). Balb mice also had a trend towards  
140 fewer tuft cells in the trachea, but equivalent frequencies of tuft cells in the thymus by  
141 flow cytometry (Fig. 1A-C).

142         Next, we tested the tuft-ILC2 circuit in Balb mice. As previously described(5, 11,  
143 12), B6 mice given 150mM sodium succinate in the drinking water for 7 days developed  
144 robust tuft cell hyperplasia in the distal SI (Fig. 1D). Balb mice given succinate drinking  
145 water failed to induce tuft cell hyperplasia, even if succinate was administered for longer  
146 (14 days) or at a higher dose (250mM for 7 days). We tested whether the defect in  
147 succinate-induced hyperplasia in Balb mice was microbiome dependent by cross-  
148 fostering Balb and B6 litters. At adulthood, Balb mice raised by a B6 dam still failed to  
149 develop tuft cell hyperplasia following succinate administration (Fig. 1E). In fact, even  
150 after succinate administration, the tuft cell frequency in Balb mice raised by B6 dams  
151 remained below the baseline B6 level. Conversely, B6 mice developed hyperplasia  
152 regardless of dam. We therefore conclude that the microbiome is not responsible for the  
153 homeostatic and induced frequency of tuft cells in B6 and Balb mice.

154         To test whether responses to succinate are restored when the starting tuft cell  
155 number in Balb mice is elevated, we ‘primed’ the tuft-ILC2 circuit of Balb mice by giving  
156 recombinant IL-25 (rIL-25) to directly induce IL-13 release from ILC2s and increase tuft  
157 cell frequency (Fig. 1F). When rIL-25 treatment was followed by a week of regular  
158 drinking water, tuft cell frequency returned towards baseline. However, mice pre-treated  
159 with rIL-25 and then given succinate for 7 days readily developed tuft cell hyperplasia.  
160 Similar results were achieved if IL-4 complex (IL-4c), which recapitulates the signaling

161 effects of IL-13 on stem cells, was administered to increase tuft cell frequency prior to  
 162 succinate administration (Fig. 1G).  
 163

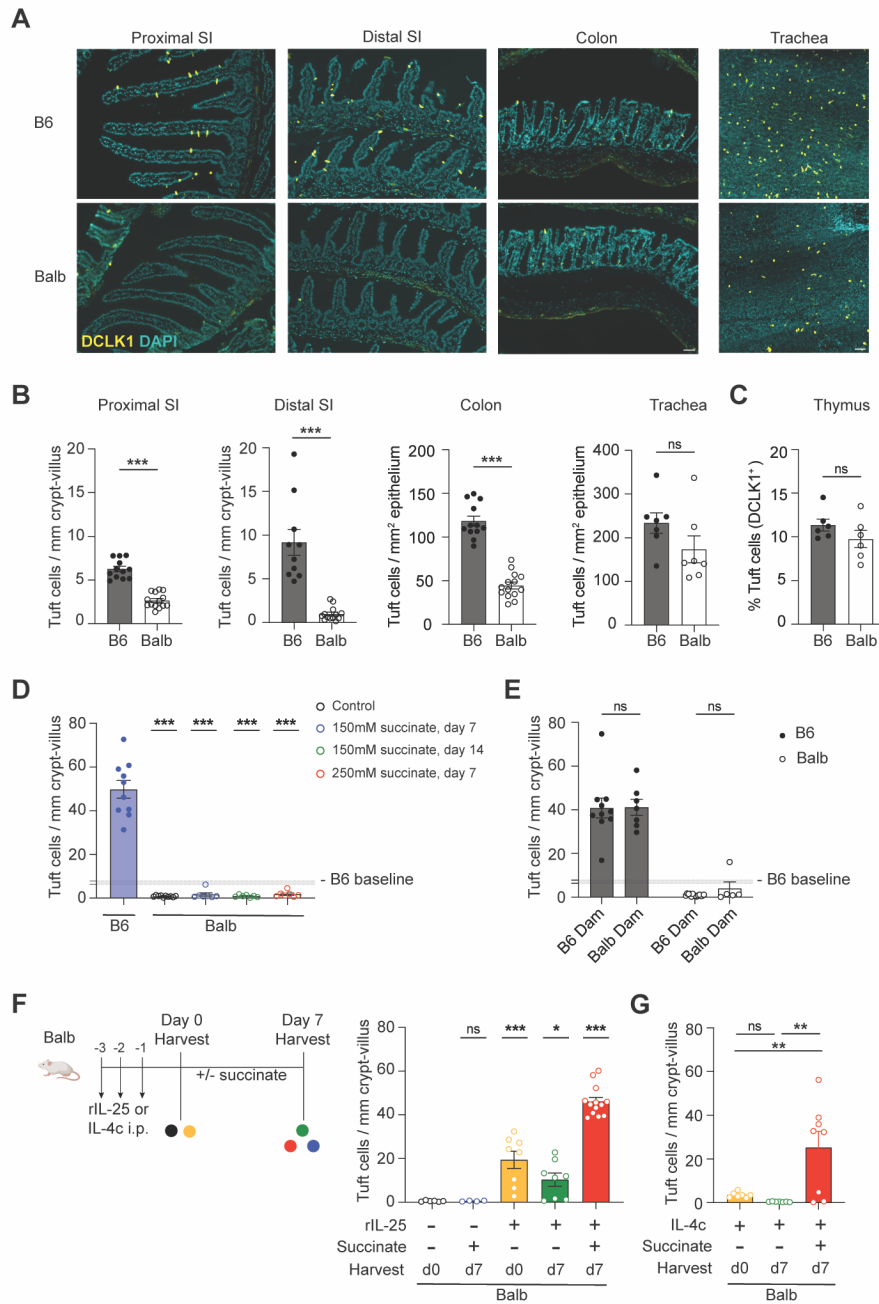

164

**Figure 1. Balb mice have fewer tuft cells at baseline and do not develop succinate induced hyperplasia unless primed. (A and B)** (A) Representative images and (B) tuft cell (DCLK1+) quantification by immunofluorescence from indicated tissues and indicated mice. **(C)** Thymic tuft cell quantification by flow cytometry. **(D)** Tuft cell quantification in the distal SI of Balb mice at indicated succinate concentrations and time points. **(E)** Tuft cell quantification in the distal SI of adult B6 and Balb mice raised by dams of indicated genotype and given 150mM succinate for 7 days. **(F-G)** Experimental schematic and tuft cell quantification in the distal SI of Balb mice treated with either (F) rIL-25 or (G) IL-4c as indicated. In the graphs, each symbol represents an individual mouse from three or more pooled experiments. In (D and E), shaded area indicates the 95% confidence interval of the mean for distal SI tuft cell quantification calculated from a large cohort of control B6 mice. \* $p < 0.05$ , \*\* $p < 0.01$ , \*\*\* $p < 0.001$  by Mann-Whitney (B and C), by one way ANOVA with comparison to B6 (D) or Balb untreated (G) or multiple comparisons (H), and by multiple t tests (E). n.s., not significant. Graphs depict mean  $\pm$  SEM. Also see

165

166 Although we have never noted sex-dependent differences in tuft cell frequency or  
167 succinate responsiveness in B6 mice (data not shown), some male Balb mice given IL-  
168 4c still failed to respond to succinate (fig. S1B). The effect of sex on tuft cells  
169 themselves is unknown, but studies of airway ILC2s have demonstrated androgen-  
170 dependent reductions in ILC2 activation(23–27). We hypothesize that SILP ILC2s are  
171 similarly impacted, but that this is only revealed in “sensitized” contexts where ILC2s are  
172 weakly activated. Nonetheless, these priming experiments demonstrate that the tuft-  
173 ILC2 circuit is intact but hyporesponsive in Balb mice.

174

### 175 **ILC2s are abundant and functional in Balb mice**

176 The tuft-ILC2 circuit contains three cellular components: mature tuft cells, ILC2s,  
177 and epithelial stem cells. To determine which component accounts for the Balb defect,  
178 we began by assessing the number, phenotype and cytokine production of ILC2s.  
179 Compared to B6 mice, unmanipulated Balb mice actually had more ILC2s (CD45<sup>+</sup>, Lin<sup>-</sup>,  
180 GATA3<sup>+</sup>) in the distal SILP (Fig. 2A-B, fig. S2A). The expression of the IL-25 receptor  
181 subunit IL-17RB was equivalent between the two strains, while CD44 and KLRG1,  
182 markers of lymphocyte activation, were both reduced on Balb ILC2s (Fig. 2C-E). We  
183 previously noted similarly-reduced KLRG1 expression on SILP ILC2s from  
184 unmanipulated *Tritrichomonas*-free B6.*Il25*<sup>-/-</sup> and B6.*Trpm5*<sup>-/-</sup> mice, suggesting tonic  
185 signaling from tuft cells to ILC2s in the absence of known tuft cell ligands (13).

186 Therefore, by analogy to these mice, the low frequency of tuft cells in Balb mice likely  
 187 leads to loss of tonic signaling and accounts for the lower KLRG1 expression. As  
 188 before, and consistent with studies in the lung(27), we noted sex-dependent differences  
 189 in KLRG1, but in all cases the Balb ILC2s had lower KLRG1 expression than sex-  
 190 matched B6 ILC2s (Fig. 2E). Male ILC2s in the SILP have higher expression of KLRG1,  
 191 yet develop less robust tuft cell hyperplasia in some assays (Fig. 1G, fig. S1B). While  
 192 counterintuitive, both findings are consistent with studies in the lung, where male ILC2s  
 193 have higher KLRG1 on a population level, yet are less activated following  
 194 stimulation(23, 27). Finally, there was no difference in the number of GATA3<sup>+</sup> Th2 cells  
 195 or eosinophils in the SILP of Balb and B6 mice (Fig. S2A-C).

## Figure 2

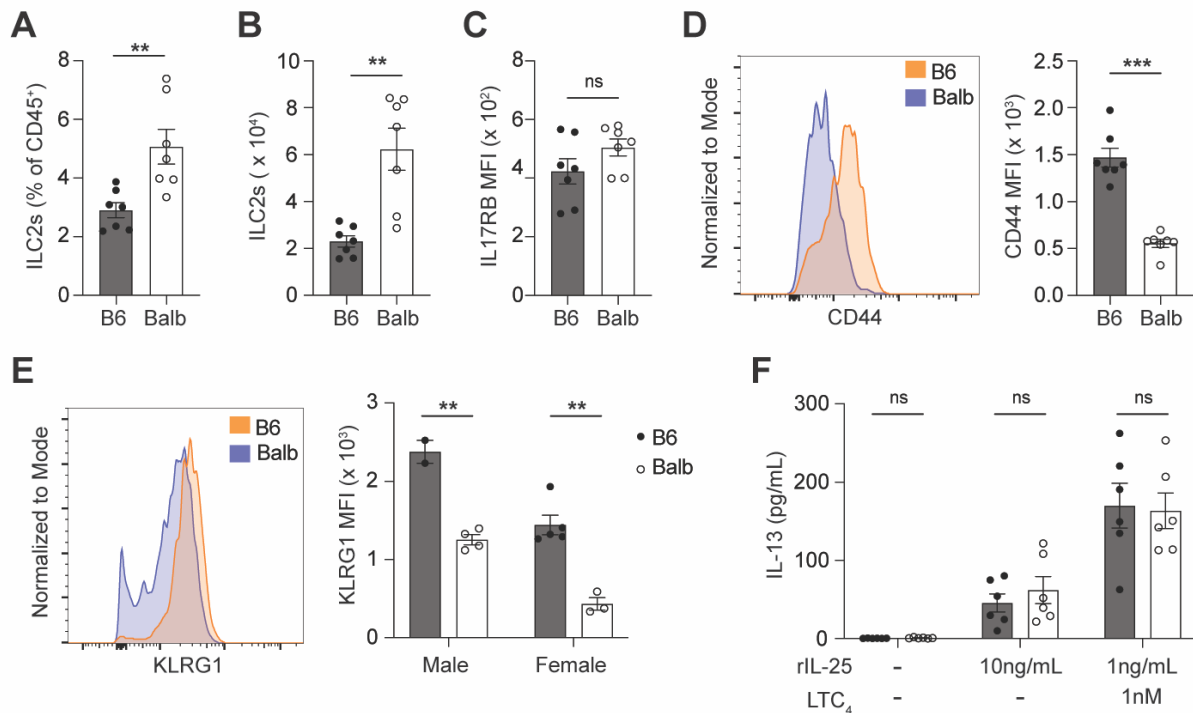

**Figure 2. Balb ILC2s are equally responsive to IL-25 but less activated at baseline compared to B6 ILC2s.** (A and B) Quantification of ILC2s (CD45<sup>+</sup> Lin<sup>-</sup> GATA3<sup>+</sup>) by (A) percentage and (B) absolute number in the SILP. (C, D and E) Quantification of (C) IL17RB MFI (D) CD44 MFI and (E) KLRG1 MFI on ILC2s. (F) IL-13 concentration in the supernatant following 6-h *in vitro* culture of SI ILC2s with the indicated concentrations of rIL-25 and LTC<sub>4</sub>. In the graphs, each symbol represents an individual mouse from two pooled experiments. \*p < 0.05, \*\*p < 0.01, \*\*\*p < 0.001 by Mann-Whitney (A – D) or by multiple t tests (E and F). n.s., not significant. Graphs depict mean +/- SEM. Also see Figure S2.



196 To test the functional capacity of Balb ILC2s, we sorted ILC2s from the SILP of  
197 unmanipulated mice and cultured them with rIL-25 with or without leukotriene C<sub>4</sub> (LTC<sub>4</sub>).  
198 B6 and Balb ILC2s made moderate but equivalent amounts of IL-5 and IL-13 following 6  
199 hours of rIL-25 treatment (Fig. 2F, fig. S2D). Cytokine production was greatly enhanced  
200 by the addition of LTC<sub>4</sub>, but IL-13 and IL-5 secretion was still equivalent between the  
201 two strains. Additionally, B6 and Balb ILC2s had equivalent expression of the  
202 proliferation marker Ki67 two days post stimulation (fig. S2E). No sex differences were  
203 observed in this assay. Overall, compared to B6, Balb ILC2s are more abundant and  
204 equally capable of responding to tuft cell signals in the SILP. The failure of Balb mice to  
205 activate the tuft-ILC2 circuit in response to succinate is therefore likely ILC2-  
206 independent.

207

### 208 **The Balb tuft cell defect is epithelium intrinsic**

209 Next, we used organoids to determine whether the Balb tuft cell defect was  
210 epithelium intrinsic or required signals from surrounding stromal or immune cells.  
211 Organoid cultures contain only epithelial cells and recapitulate epithelial differentiation,  
212 including IL-13-induced tuft cell hyperplasia(7–9). Tuft cell frequency was significantly  
213 lower in untreated Balb organoids compared to B6 organoids after both 1 and 4 weeks  
214 in culture, demonstrating that the tuft cell defect is epithelium intrinsic and stably  
215 maintained *ex vivo* (Fig. 3A-B, Fig. S3A). Recombinant IL-13 (rIL-13) induced tuft cell  
216 hyperplasia in organoids from both strains; however, Balb organoids had a lower  
217 frequency of tuft cells when compared to B6 organoids, particularly when cultured 4  
218 weeks before rIL-13 treatment (Fig. 3C). Given that Balb organoids started from a lower  
219 baseline, the fold increase in tuft cells induced by rIL-13 was greater in Balb organoids,  
220 suggesting their defect predominantly impacts IL-13-independent tuft cell differentiation  
221 (Fig. S3B).

222 To assess if the Balb defect is specific to tuft cells, we used qPCR to quantify all  
223 secretory cell lineages in organoids after 2 weeks in culture. Untreated Balb organoids  
224 had significantly lower expression of the tuft cell gene *Pou2f3*, and a strong trend  
225 toward less *Dcl1* (Fig. 3D). Expression of the goblet cell genes *Spdef* and *Muc2*, the  
226 Paneth cell marker *Lyz1* and the enteroendocrine cell marker *Chga* was equivalent

227 between Balb and B6 organoids (Fig. 3D). Using this transcriptional measure, there was  
 228 no difference between rIL-13 treated Balb and B6 organoids for any gene, including tuft  
 229 cell markers (Fig. 3E). The discrepancies with Fig. 3C suggest post-transcriptional  
 230 regulation of tuft cell differentiation, but also further support the conclusion that the Balb  
 231 defect predominantly impacts homeostatic tuft cell differentiation. Together, these data  
 232 demonstrate a tuft cell-specific and epithelium-intrinsic reduction in Balb mice.

### Figure 3

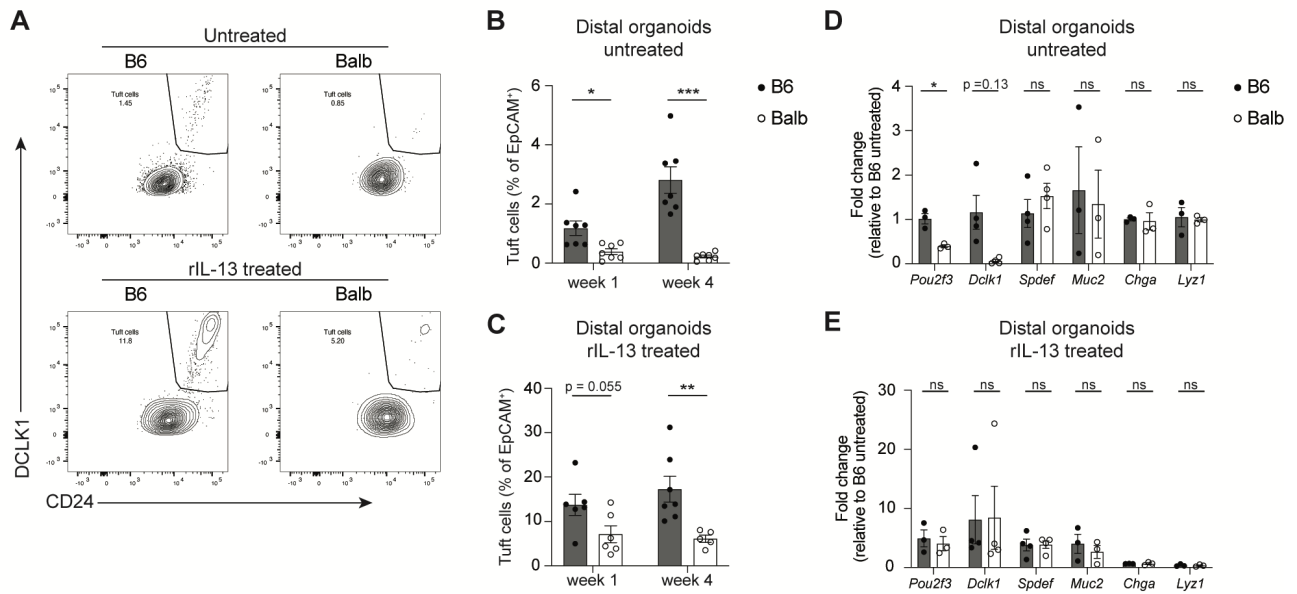

**Figure 3. Balb tuft cell defect is epithelium intrinsic and tuft cell specific.** (A) Representative flow cytometry plots of tuft cell quantification from B6 or Balb distal SI organoids cultured *in vitro* for one week, either untreated or rIL-13 treated (2.5 ng/ml). (B and C) Quantification of tuft cells from (A) (D and E) Real-time PCR quantification of indicated genes normalized to B6 untreated condition, all relative to *Rps17* expression from (D) control or (E) rIL-13 treated distal SI organoids cultured for 2 weeks *in vitro*. In the graphs, each symbol represents a biological replicate based on the average of 2 to 3 technical replicates, from three to six pooled experiments. \*p < 0.05, \*\*p < 0.01, \*\*\*p < 0.001 by multiple t tests (B - E). n.s., not significant. Graphs depict mean + SEM. Also see Figure S3.

233

### 234 Differential tuft cell frequency between B6 and Balb mice is genetically regulated

235 We next hypothesized that the Balb and B6 differences in tuft cell frequency and  
 236 succinate responsiveness are determined by genetic differences between the two  
 237 strains. To test heritability of succinate responsiveness, we generated Balb x B6 F1 and  
 238 F2 mice and measured tuft cell frequency after succinate treatment. In this context we

239 again noted reduced succinate responses in male mice (fig. S4A-B), so we assessed  
240 succinate response rates using female F1 and F2 mice. F1 mice all developed tuft cell  
241 hyperplasia when treated with succinate, but there were both responsive and  
242 nonresponsive mice in the F2 generation (Fig. 4A). Using a cutoff of 13 tuft cells/mm  
243 crypt villus, which is just above the B6 baseline, 80% of F2 female mice responded to  
244 succinate. The frequency of succinate responsive F1 and F2 mice is therefore consistent  
245 with a single recessive locus determining tuft cell differences between Balb and B6  
246 mice.

247         Combining high-density single nucleotide polymorphism (SNP) genotyping with  
248 phenotypes of F2 mice is a powerful technique for identification of quantitative trait loci  
249 (QTL) that explain phenotypic variation. We therefore employed low-coverage whole  
250 genome sequencing coupled to imputation to genotype B6 x Balb F2 mice (28). In brief,  
251 Tn5 transposase was used to randomly insert DNA tags into genomic DNA from 84 B6  
252 x Balb F2 mice, here analyzing both male and female mice. Tag-adjacent genomic  
253 sequences were obtained by next-generation sequencing and assigned to B6 and Balb  
254 genomes to provide whole-genome genotyping at higher resolution than traditional  
255 SNP-based arrays. We then combined these genotypes with the succinate-induced tuft  
256 cell frequency of each F2 mouse and performed QTL mapping. We detected a dominant  
257 QTL on chromosome 9 (Chr9), with a peak at 50,857,809 bp and 1.5 LOD support  
258 interval from 45.49 Mb to 53.03 Mb (Fig. 4B-C). Sex was a significant additive covariate,  
259 but the Chr9 locus was dominant in both sexes (fig. S4C). An effect plot at the peak  
260 QTL location revealed a clear gene dosage dependent response to succinate (Fig. 4D),  
261 and the Chr9 locus explained 53% of the variance in succinate response in this 84-  
262 mouse F2 cohort. Thus, a single locus accounts for a majority of the difference in  
263 succinate-induced tuft cells between B6 and Balb mice.

264         To begin fine mapping and to generate congenic mice in which only the Chr9  
265 locus is B6-derived, we initiated a series of backcrosses. B6 x Balb F1 mice were  
266 crossed to wild-type Balb mice and resulting offspring were again crossed to wild-type  
267 Balb mice for 6 to 8 generations. In each generation, we used low-coverage whole  
268 genome sequencing coupled to imputation to look for crossover events that reduced the  
269 size of the Chr9 locus and to identify mice that had lost B6 DNA in other regions (a

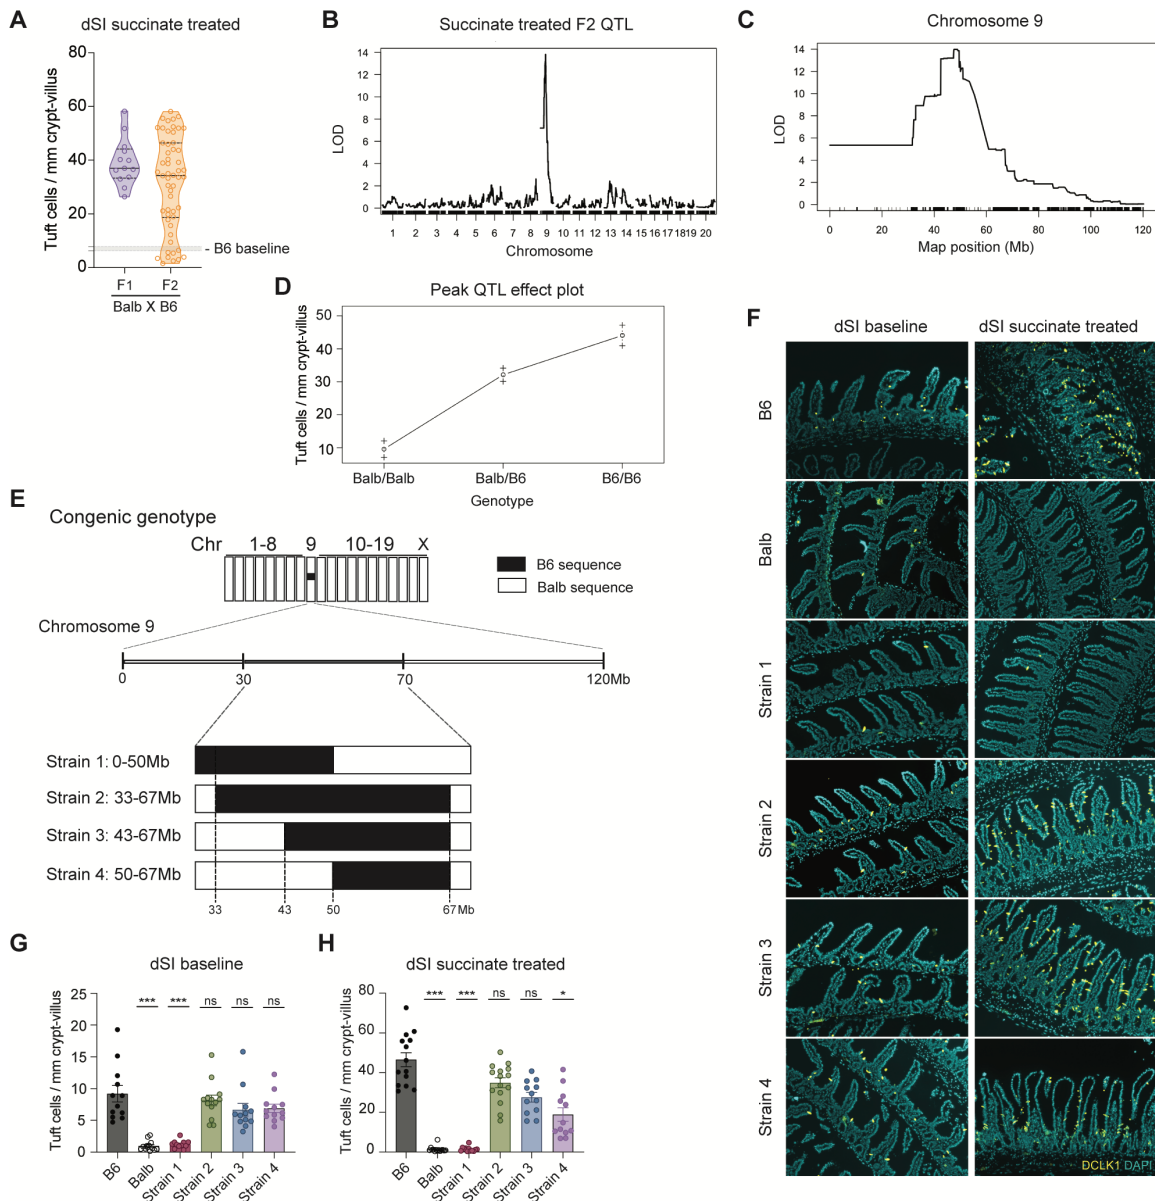

**Figure 4. A single locus on chromosome 9 regulates baseline tuft cell frequency and succinate responsiveness.** (A) Quantification of tuft cells from distal SI of succinate treated female mice. (B and C) QTL mapping of succinate induced tuft cell hyperplasia in Balb X B6 F2 cross (B) whole genome and (C) zoomed in on Chr9. (D) Effect plot of tuft cell phenotype based on genotype at the peak QTL (Chr9:50857809) (E) Schematic of genotype for congenic Strain 1-4 mice. (F - H) (F) Representative images and quantification of tuft cells from distal SI at (G) baseline or (H) after 150mM succinate treatment. Some B6 and Balb data points shown in (G) and (H) are also included as controls in Figure 1B and 1D. In (A), shaded area indicates the 95% confidence interval of the mean for distal SI tuft cell quantification calculated from a large cohort of control B6 mice. In the graphs, each symbol represents an individual mouse from three or more pooled experiments. \* $p < 0.05$ , \*\* $p < 0.01$ , \*\*\* $p < 0.001$  by one-way ANOVA (G and H) with comparison to B6. n.s., not significant. Graphs depict mean +/- SEM. Also see Figure S4.

271 process sometimes called speed congenics). This process generated 4 strains of  
272 congenic mice carrying distinct B6-derived portions of the Chr9 QTL and homozygous  
273 for Balb DNA at all other locations (Fig. 4E).

274 Congenic strains 2-4 had B6-equivalent levels of tuft cells in the distal SI at  
275 baseline and developed tuft cell hyperplasia when succinate treated (Fig. 4F-H). Tuft  
276 cell frequency was also increased in proximal SI, colon, and trachea of Strain 3 mice  
277 compared to Balb (Fig. S4D-F). Strain 1 had Balb-equivalent levels of tuft cells at  
278 baseline and did not develop tuft cell hyperplasia after succinate treatment (Fig. 4F-H).  
279 Strain 1 contains B6 sequence from 33-50Mb, indicating the relevant locus is not within  
280 this region. Instead, the locus controlling baseline tuft cell number and succinate  
281 responsiveness is in the 50-67Mb region shared by Strains 2, 3, and 4. In sum, the 50-  
282 67 Mb region of Chr9 explains most of the differential succinate sensing in B6 and Balb  
283 mice, and when placed in a Balb genome restores B6 levels of homeostatic tuft cells  
284 and succinate responsiveness in the distal SI.

285

### 286 **RNA sequencing identifies *1810046K07Rik* / *Pou2af2* as a gene of interest**

287 Genetic variation within species often shapes traits by either changing the  
288 expression of genes or the amino acid sequence of the proteins they encode. To  
289 discover the gene(s) mediating the difference, we systematically compared the  
290 congenic interval (Chr9:50-67 Mb) in B6 and Balb mice. We found that the interval  
291 contains ~3170 genetic variants that distinguish B6 and Balb genomes. Many of these  
292 variants are in intergenic regions or associated with genes that are not expressed in the  
293 SI epithelium, but even focusing on the 1.5 LOD confidence interval and on variants  
294 predicted to alter protein sequence, it was difficult to identify candidates for further  
295 investigation.

296 To assess gene expression and leverage the congenic strains, we sequenced  
297 the mRNA of tuft cells (CD45<sup>-</sup> EPCAM<sup>+</sup> SigF<sup>+</sup> CD24<sup>+</sup>) sorted from the distal SI of B6,  
298 Balb, and congenic Strain 3 mice and identified differentially expressed genes (DEGs;  
299 log<sub>2</sub>FC > 1, FDR < .05) (Fig. S5A-C). Hierarchical clustering of all DEGs revealed 3  
300 expression modules (Fig. 5A). Within each module, we looked for genes that were part  
301 of the SI tuft cell signature and/or located in the Chr9 locus (5) (Table S1). Module 1

302 was comprised of genes more highly expressed in Balb and congenic than B6. One  
303 gene, *Hebp1*, was a tuft cell signature gene, but is not located on Chr9. *Gm7293*,  
304 encoded at 51.5 Mb on Chr9 was also in this module. Module 2 contained a subset of  
305 31 genes enriched selectively in Balb samples. Many of these genes were Paneth cell  
306 related, such as lysozyme and defensins, and likely represented low-level  
307 contamination by CD24<sup>+</sup> Paneth cells, which is amplified in Balb samples due to the  
308 rarity of tuft cells in these mice. None of these genes are located on Chr9. Module 3  
309 contained genes more highly expressed by B6 tuft cells compared to congenic or Balb.  
310 There were several tuft cell signature genes within this module, including *Sucnr1* (Fig.  
311 5B). *Sucnr1* is encoded on Chr3, is unlikely to directly impact tuft cell differentiation, and  
312 was not upregulated in congenic Strain 3 tuft cells, so it does not explain baseline  
313 differences in tuft cell frequency. Reduced *Sucnr1* expression could, however,  
314 contribute to the failure of Balb mice to sense succinate, yet the effect of the Chr9 locus  
315 in Strain 3 mice was enough to restore succinate sensing despite Balb-equivalent  
316 *Sucnr1* expression (Fig. 4H).

317 To focus on transcriptional regulation revealed by the congenic mice, we  
318 performed a pair-wise comparison between Balb and Strain 3, but identified only 5  
319 DEGs, and none are encoded on Chr9 (Fig. 5C). Since genome-wide DEG analysis did  
320 not identify any candidate genes, we specifically compared genes from the Chr9 locus  
321 (50-67Mb) in B6 and Balb mice (Fig. 5D). *Gm7293* again appeared as highly  
322 upregulated in Balb mice, while *1810046K07Rik* was the top downregulated gene.  
323 *1810046K07Rik* also stood out as the only tuft cell signature gene that was  
324 downregulated in Balb mice but rescued in Strain 3 congenic mice, while *Gm7293*  
325 expression was unchanged between Balb and Strain 3 (Fig. 5E-G).

326 *1810046K07Rik* and another gene, *Colca2*, were recently found to encode co-  
 327 factors required for the function of POU2F3(29, 30). These genes, and the proteins they  
 328 encode, were respectively renamed *Pou2af2/OCA-T1* and *Pou2af3/OCA-T2* and are  
 329 located in a gene cluster together with *Pou2af1/OCA-B*. OCA-B is a co-factor for OCT-1  
 330 and OCT-2, transcription factors closely related to POU2F3(31). This gene cluster is  
 331 located at 51.2 Mb on Chr9, very close to the QTL peak (50.8 Mb).

## Figure 5

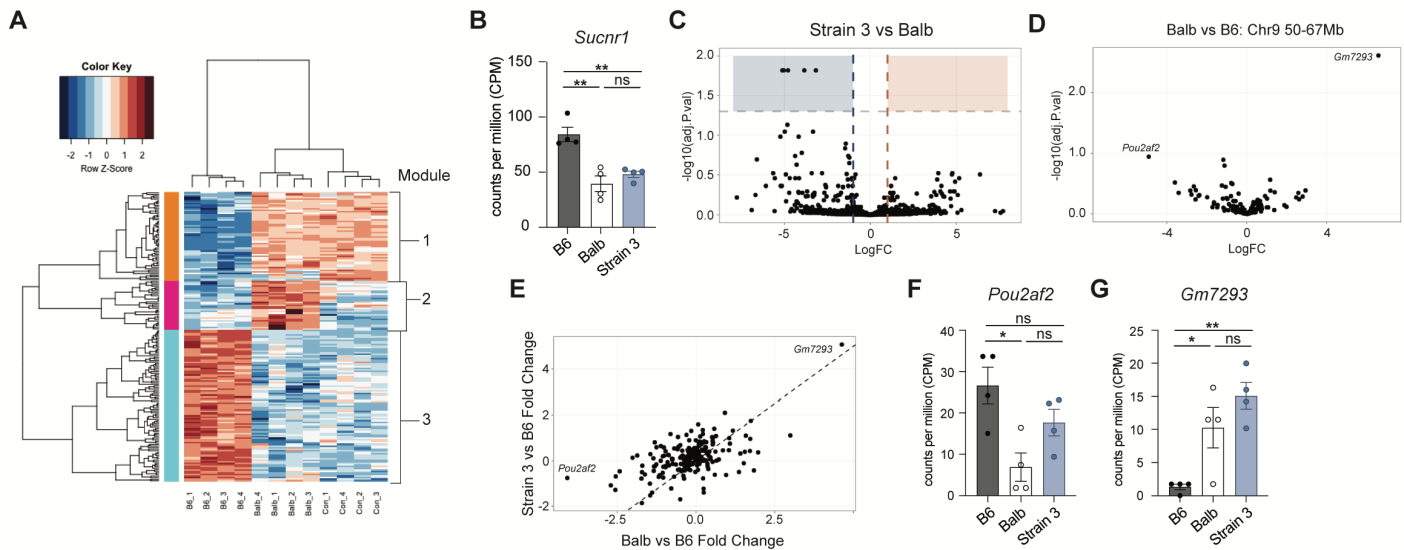

**Figure 5. mRNA sequencing of mature tuft cells from B6, Balb and Strain 3 mice.** (A) Hierarchical clustering of differentially expressed genes. (B) Normalized read count of *Sucnr1*. (C) Volcano plots depicting DEGs from Strain 3 vs Balb. (D) Volcano plots depicting DEGs for genes found in the Chr9 50-67Mb region, from Balb vs B6. (E) Plot of fold change of DEGs from Strain 3 vs B6 compared to fold change from Balb vs B6. (F and G) Normalized read count of (F) *Pou2af2* and (G) *Gm7293*. \*p < 0.05, \*\*p < 0.01, \*\*\*p < 0.001 by one-way ANOVA (B, F and G). n.s., not significant. Graphs depict mean + SEM. Also see Figure S5.

332

### 333 Differential *Pou2af2* isoform expression in intestinal crypts

334 *Pou2af2*<sup>-/-</sup> mice were reported to lack tuft cells in the SI and trachea, but have  
 335 normal tuft cell numbers in the thymus, a distribution similar to our findings in Balb  
 336 mice(29). *Pou2af3*<sup>-/-</sup> mice have not yet been generated, but *Pou2af3* expression is low  
 337 or undetectable in RNA sequencing of SI tuft cells, and it is not included in the SI tuft  
 338 cell signature(5). We therefore focused our attention on identifying a mechanism by  
 339 which *Pou2af2* might regulate differential tuft cell phenotypes in B6 and Balb mice.

340 Because *Pou2af2* is currently annotated with two transcriptional start sites, we  
341 used 5' Rapid Amplification of cDNA Ends (RACE) for unbiased amplification of  
342 *Pou2af2* transcripts. Since the few mature tuft cells that emerge in Balb mice may not  
343 represent events that occur during differentiation, we used RNA from distal SI crypts to  
344 capture tuft cell progenitor cells. A primer designed to capture all annotated isoforms  
345 produced ~550bp and ~450bp bands in B6 samples. Balb samples lacked the 550bp  
346 band but contained the 450bp band and a faint ~100bp band (Fig. 6A). Cloning and  
347 sequencing of these bands revealed that the 100bp band resulted from non-specific  
348 amplification of 18S RNA and the 550bp band corresponded to the full-length *Pou2af2*  
349 isoform (Fig. 6B). The 450bp band present in both Balb and B6 samples, however,  
350 corresponded to an isoform not listed in the current *Mus musculus* genome release  
351 (GRCm39) and did not appear to use either of the annotated transcriptional start sites.  
352 This isoform begins 26bp downstream of the annotated transcription start site in exon 2  
353 of the full-length isoform. The first available translation start site in this isoform gives rise  
354 to a truncated protein that lacks a 20 amino acid N-terminal motif shared by OCA-T1,  
355 OCA-T2, and OCA-B, and required for binding to their target transcription factors (i.e.  
356 POU2F3 or OCT-1/2)(29, 32). We did not find evidence that any of the other annotated  
357 isoforms were expressed in SI crypts.

358 The results of the 5' RACE allowed us to design qPCR primers to quantify the  
359 abundance of the full-length transcript only and of all transcripts combined. No primers  
360 could be designed for just the short isoform, as it shares 100% homology with the full-  
361 length isoform. Due to the lack of tuft cells in Balb mice, Balb SI crypts had significantly  
362 lower expression of *Pou2f3* and both isoforms of *Pou2af2* than B6 crypts (Fig. 6C-D).  
363 Within each sample, however, the portion of total *Pou2af2* transcript accounted for by  
364 full-length transcript is also significantly lower in Balb crypts compared to B6 (Fig. 6D).  
365 Crypts from congenic strain 1 phenocopy Balb crypts with about 10% of total *Pou2af2*  
366 transcript being the full-length isoform. Congenic strains 2,3 and 4 express 70-80% full-  
367 length isoform, similar to B6 (Fig. 6D).

368 We also used qPCR to analyze *Pou2af3* expression and isoform usage. *Pou2af3*  
369 has a full-length and a short isoform that each contain unique portions, allowing us to  
370 design isoform-specific primers. As with *Pou2af2*, the short isoform of *Pou2af3* lacks the



371 POU2F3 binding domain. As expected, SI crypt expression of *Pou2af3* is lower than  
372 *Pou2af2* regardless of strain and lower in Balb and Strain 1 than B6 and Strain 2-4 (fig.  
373 S6A). The full-length isoform in particular was nearly undetectable in all mice.  
374 Nonetheless, Balb and Strain 1 had a decreased ratio of full-length to total *Pou2af3* and  
375 increased ratio of short isoform to total *Pou2af3* compared to B6, Strain 2, 3 and 4 (fig.  
376 S6B-C). Finally, as in the organoids, there was no difference in expression of genes for  
377 other lineages of epithelial cells between B6 and Balb crypts, confirming that the Balb  
378 defect is tuft cell specific (fig. S6D).

379 To understand if the differences between B6 and Balb mice were generalizable,  
380 we examined baseline tuft cells and succinate sensing in additional strains of mice.  
381 Succinate responsiveness was highly variable in Swiss Webster mice, an outbred  
382 strain, suggesting genetic diversity can lead to diverse succinate responses (Fig. S6E).  
383 Testing inbred strains, we found FVB/NJ and C3H/HeJ strains had very low numbers of  
384 tuft cells at baseline and did not develop tuft cell hyperplasia following succinate  
385 treatment, phenocopying Balb (Fig. 6E). On the other hand, 129S1/SvImJ mice had  
386 close to B6 levels of tuft cells at baseline and upon succinate treatment developed tuft  
387 cell hyperplasia in the distal SI. We measured *Pou2af2* isoform expression in distal SI  
388 crypts from these strains. The ratio of full-length isoform to total *Pou2af2* expression  
389 corresponded with baseline tuft cell number and succinate phenotype, with  
390 129S1/SvImJ mice having a high ratio, similar to B6, and FVB/NJ and C3H/HeJ mice  
391 having a low ratio, similar to Balb (Fig. 6F). Although total *Pou2af3* expression was  
392 again lower than *Pou2af2*, the ratio of short and long isoforms followed the same trend  
393 as *Pou2af2*. (fig. S6F). It appears, therefore, that *Pou2af2* and *Pou2af3* are somehow  
394 coregulated, but given the higher expression of *Pou2af2* and the similarities between  
395 *Pou2af2*<sup>-/-</sup> and Balb mice, we propose that the production of fewer mature tuft cells in  
396 Balb and Strain 1 mice results from a lack of functional OCA-T1 expression and  
397 therefore a failure to induce POU2F3-dependent gene transcription.

## Figure 6

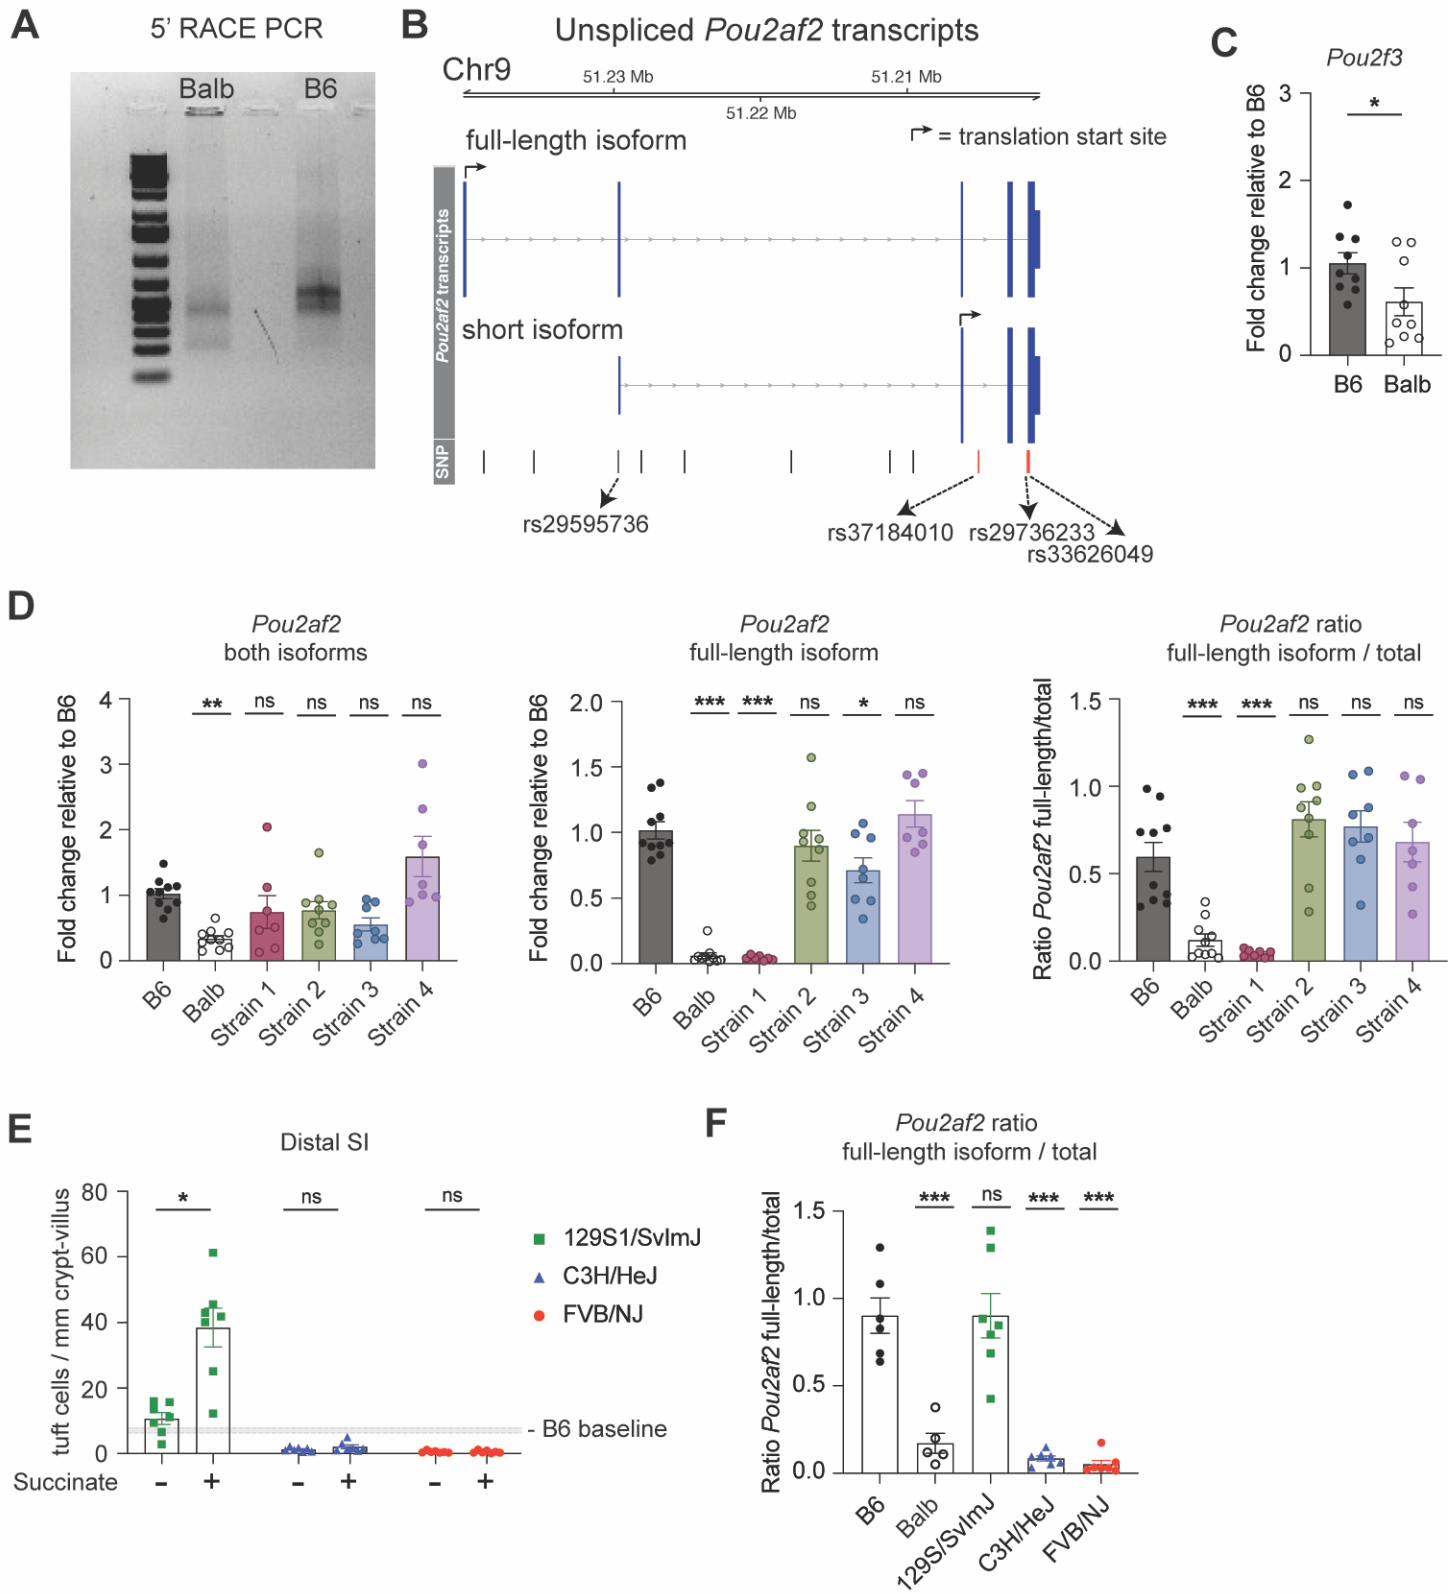

**Figure 6. *Pou2af2* isoform expression is modulated by genotype.** (A) Agarose gel of 5' Rapid amplification of cDNA ends products from distal SI crypts. (B) Schematic of *Pou2af2* isoforms expressed in distal SI crypts with annotated SNPs (vertical bars) that differ between B6 and Balb. SNPs that also match phenotypes of other inbred strains are highlighted in red. (C) Real-time PCR quantification of *Pou2f3*. (D) Real-time PCR quantification of indicated *Pou2af2* isoform and *Pou2af2* isoform ratio. (E) Tuft cell quantification in the distal SI and (F) *Pou2af2* isoform ratio calculated from real-time PCR quantification from distal SI crypts of indicated strains. In the graphs, each symbol represents an individual mouse three or more pooled experiments. \* $p < 0.05$ , \*\* $p < 0.01$ , \*\*\* $p < 0.001$  by Mann-Whitney (C), by one-way ANOVA (D and F) with comparison to B6 and by multiple t-tests (E). n.s., not significant. Graphs depict mean  $\pm$  SEM. Also see Figure S6.

399

### 400 **Analysis of genetic variants in *Pou2af2* locus**

401 Analysis of genetic variants in the *Pou2af2* locus revealed 11 single nucleotide  
402 polymorphisms (SNPs) that distinguish B6 and Balb mice, several of which may be of  
403 interest (Fig. 6B). First is rs29595736, located in exon 2 of the full-length isoform and  
404 just upstream of the transcriptional start site of the short isoform (fig. S6G). This SNP is  
405 actually annotated as a splice acceptor variant, but that is based on annotation of an  
406 isoform that we did not detect in epithelial crypts. Instead, rs29595736 leads to an  
407 arginine (B6) to glycine (Balb) transition at amino acid 6 of full-length OCA-T1, which is  
408 just outside the POU2F3 binding site. Although we cannot rule out a change in protein  
409 function due to this SNP, its positioning just upstream of a transcriptional start site is  
410 more interesting from the perspective of isoform abundance. That said, 129S1/SvImJ  
411 mice, which phenocopy B6 mice, carry the Balb allele of rs29595736. Three other SNPs  
412 of interest are rs336266049, rs29736233, and rs37184010 (Fig. 6B, marked in red).  
413 These SNPs are all intronic, but they correlate with the tuft cell phenotypes of inbred  
414 strains; B6 and 129S1/SvImJ encode the same nucleotide, while Balb, FVB/NJ and  
415 C3H/HeJ all encode a different nucleotide. More work is needed to understand whether  
416 these and/or more distal SNPs impact isoform expression or tuft cell differentiation.

### 417 **Tuft cell abundance tunes sensitivity and kinetics of the tuft-ILC2 circuit**

418 To understand the physiologic impact of low baseline tuft cell frequency and the  
419 role of *Pou2af2*, we used protists and helminths to activate the tuft-ILC2 circuit. While  
420 acute administration of succinate failed to activate the tuft-ILC2 circuit in Balb mice,

421 *Tritrichomonas* protists chronically colonize mice from weaning and are perhaps more  
422 immunostimulatory than succinate alone. Nonetheless, adult Balb mice colonized with  
423 *Tritrichomonas* from birth failed to induce tuft cell hyperplasia. Responses in congenic  
424 Strain 3 mice were more variable, with only some mice developing hyperplasia despite  
425 elevated baseline tuft cell frequency in all mice. The lower expression of *Sucnr1* (Fig.  
426 5B) and an unexplained ~60% lower protist burden (Fig. 7B) in Strain 3 mice likely kept  
427 them at or below the threshold for tuft-ILC2 circuit activation.

428         Next, we infected Balb and B6 mice with the helminth *Nippostrongylus*  
429 *brasiliensis* (*Nb*), an acute infection model that strongly activates the tuft-ILC2 circuit  
430 and is cleared within 7-8 days in B6 mice. Over the course of infection, Balb mice  
431 developed tuft cell hyperplasia, but with delayed kinetics compared to B6 (Fig 7C, fig.  
432 S7A). Balb mice had 50% higher worm burden on day 5 post infection, but complete  
433 worm clearance was not delayed (Fig. 7D). Therefore, although Balb mice start with  
434 fewer tuft cells, tuft-ILC2 circuit activation reaches a threshold required for *Nb* clearance  
435 and/or other mechanisms, such as a stronger adaptive Th2 responses, compensate for  
436 innate defects in Balb mice.

437         *Heligmosomoides polygyrus* (*Hp*) provides a model of long-term SI helminth  
438 infection, with clearance taking 6 weeks or more (33). As mentioned previously, Balb  
439 mice clear *Hp* infection more rapidly than B6, likely due to a stronger adaptive type 2  
440 immune response (17, 34, 35), but the differences during early infection have not been  
441 well characterized. We wondered whether Strain 3 mice could benefit from both  
442 enhanced B6-like innate responses and a stronger Balb-like Th2 response. During  
443 primary infection, all three strains had equivalent tuft cell hyperplasia by day 12, with  
444 Strain 3 mice trending towards having more tuft cells compared to both B6 and Balb  
445 (Fig. 7E). However, worm fecundity (eggs laid per worm), worm burden, and total fecal  
446 egg counts trended lower in both B6 and Strain 3 mice, suggesting an earlier onset of  
447 protective immunity (Fig. 7F-G, fig. S7B). To test immune memory, we infected mice  
448 with *Hp* for 14 days, cleared infection with pyrantel pamoate, waited 28 days, and then  
449 challenged the mice with a secondary *Hp* infection. On Day 14 of challenge infection,  
450 Balb and Strain 3 mice had fewer worms in the intestine compared to B6 (Fig. 7F).  
451 Together these data demonstrate that innate tuft-ILC2 responses are delayed or even

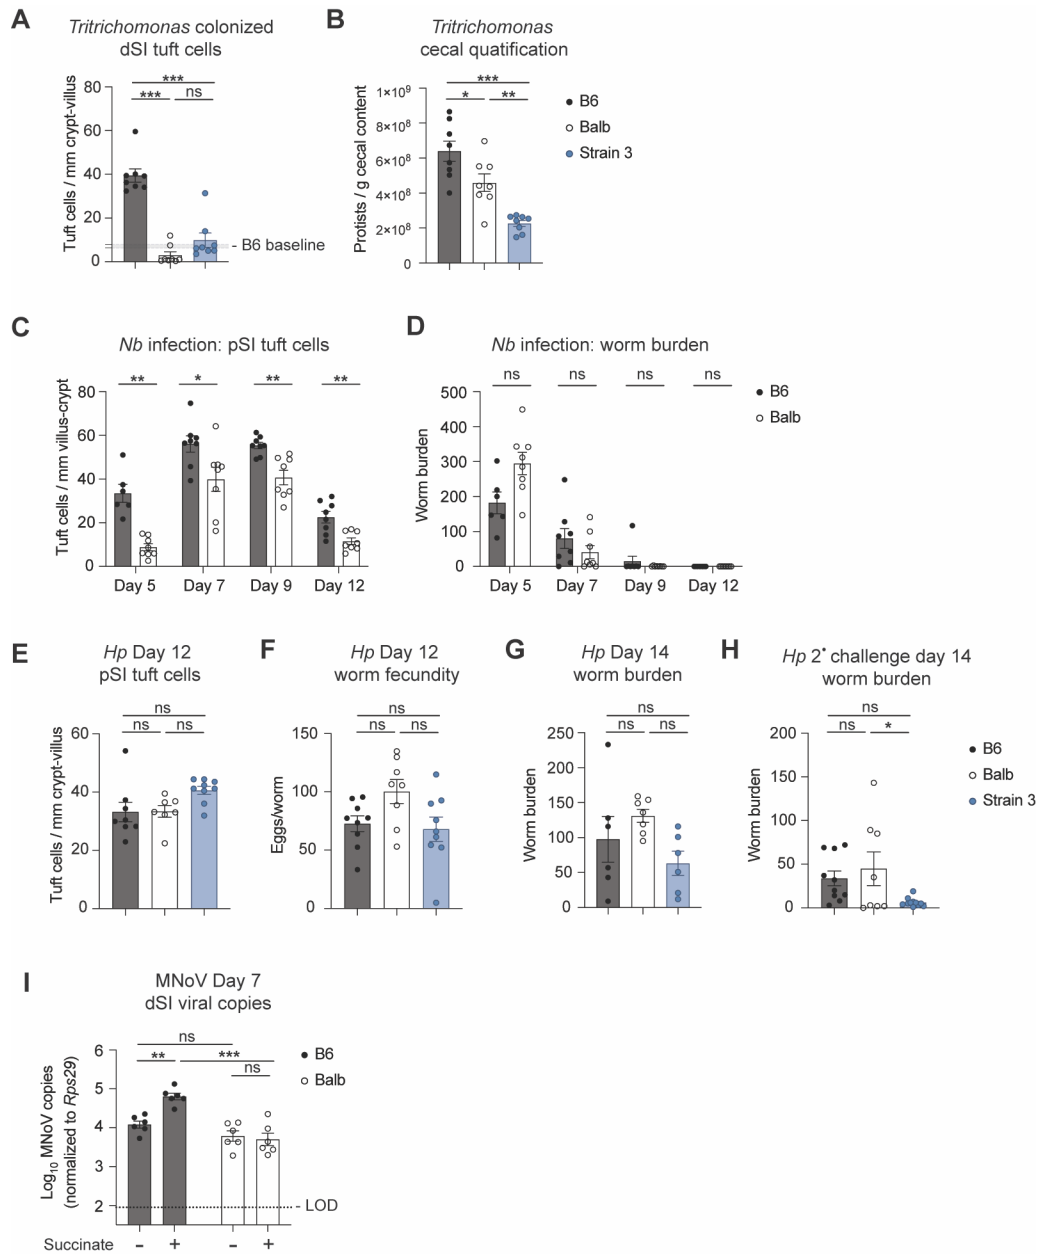

**Figure 7. Tuft cell frequency at baseline tunes the kinetics and sensitivity of the tuft-ILC2 circuit.** (A) Tuft cell quantification in the distal SI and (B) protist quantification in the cecal content of *Tritrichomonas* colonized mice. (C) Tuft cell quantification in the proximal SI and (D) worm burden in total intestine at the indicated time points post *Nb* infection. (E) Tuft cell quantification in the proximal SI on day 12 post *Hp* infection. (F) Overnight egg production by worms isolated from the proximal SI of mice 12 days post *Hp* infection. (G and H) Intestinal worm burden on day 14 of (G) primary or (H) secondary *Hp* infection 28 days after drug-cleared primary infection. (I) Mice were pretreated with 150mM sodium succinate or 300mM sodium chloride for 1 week prior to oral infection with murine norovirus (MNoV) CR6. Viral genome copies detected in the distal SI 7 days after CR6 infection. Dotted line represents limit of detection (LOD). In (A), shaded area indicates the 95% confidence interval of the mean for distal SI tuft cell quantification calculated from a large cohort of control B6 mice. In the graphs, each symbol represents an individual mouse from two or three pooled experiments. \*p < 0.05, \*\*p < 0.01, \*\*\*p < 0.001 by multiple t tests (C and D), by one-way ANOVA (A and B, E to H) or by two way ANOVA (I). n.s., not significant. Graphs depict mean +/- SEM. Also see Figure S7.

453 can develop and contribute to enhanced worm restriction and clearance. Congenic mice  
454 demonstrate both early B6-like and late Balb-like restriction.

455 In addition to sensing helminths and protists, intestinal tuft cells are the reservoir  
456 for murine norovirus strain CR6 and previous work has demonstrated that norovirus  
457 burden is regulated by type 2 signaling(36). Accordingly, unmanipulated B6 mice had  
458 ~2-fold higher CR6 burdens than Balb. Treatment with succinate to mimic protist  
459 colonization increased ileal CR6 titers ~5-fold in B6 mice, but had no effect on titers in  
460 Balb mice (Fig. 7I). The two strains had similar norovirus titers in the colon regardless of  
461 succinate treatment (fig. S7D). In sum, baseline tuft cell frequency helps determine the  
462 sensitivity and kinetics of the innate tuft-ILC2 circuit. Balb mice maintain functional  
463 responses to helminth infection while ignoring *Tritrichomonas* colonization and lowering  
464 their norovirus burden.

465

## 466 **Discussion**

467 Since the identification of the tuft-ILC2 circuit, numerous studies have uncovered  
468 ligands, receptors, and effector molecules that regulate this circuit. Much less progress  
469 has been made towards understanding cell intrinsic pathways by which epithelial stem  
470 cells commit to a tuft cell lineage, and how this process regulates tuft-ILC2 circuit  
471 activation. Here we identified differential *Pou2af2* isoform usage as a mechanism that  
472 establishes the baseline frequency of tuft cells in multiple tissues and tunes the  
473 sensitivity and kinetics of innate type 2 immunity in the SI.

474 We found that while unmanipulated Balb mice had fewer tuft cells at mucosal  
475 sites throughout the body, the B6 sequence from 50-67Mb on Chr9 was sufficient to  
476 restore tuft cell numbers to a B6 level in the SI and trachea (Fig. 4F-G, fig. S4D and F).  
477 Further, congenic mice carrying this interval develop hyperplasia when treated with  
478 succinate or, in some cases, when colonized with *Tritrichomonas* (Fig. 4H and Fig. 7A).

479 At 51.2 Mb on Chr9, adjacent to the QTL peak at 50.8 Mb, is *Pou2af2*, which was  
480 recently shown to encode a POU2F3 co-factor (OCA-T1), and to be necessary for tuft  
481 cell differentiation in the SI (29). We found two isoforms of *Pou2af2* expressed in distal  
482 SI crypts, a full-length isoform and a shorter isoform, which lacks the POU2F3  
483 interaction domain (Fig. 6A-B). Balb and Strain 1 SI crypts express significantly less of

484 the functional full-length *Pou2af2* isoform compared to B6 or Strain 2-4 SI crypts (Fig.  
485 6D), leading us to propose that *Pou2af2* isoform usage determines the number of tuft  
486 cells at baseline in the SI. What exactly determines isoform transcription is, as yet,  
487 unknown. There are several SNPs of interest within the *Pou2af2* locus, but transcription  
488 may be regulated by distal enhancers. The apparent co-regulation of *Pou2af2* and  
489 *Pou2af3* transcription in particular suggests a broader regulatory mechanism that may  
490 be revealed by analysis of 3D genome structure.

491 Interestingly, the entire region of mouse Chr9 from 26.7 to 54 Mb is syntenic with  
492 human Chr11, suggesting that the shared function and regulation of genes in this region  
493 is evolutionarily conserved. In addition to the *Pou2af* gene cluster, *Pou2f3* is located at  
494 43Mb on mouse Chr9 and 120Mb on human Chr11. Intriguingly, *Pou2f3* has been  
495 linked to several human cancers, including small cell lung cancer and colon cancer(37,  
496 38). Particularly relevant to our findings, SNPs in or near *Pou2af2* have also been linked  
497 to colon cancer and tuft cell abundance through genome-wide association studies and  
498 *in silico* analysis(39, 40). Further studies are needed to fully reveal the role of tuft cells  
499 and regulation of these genes in the context of human cancers and immunity. Other tuft  
500 cell signature genes in this syntenic region include *Nrgn* and *Dscaml1*, and further  
501 analysis may identify additional genes or regulatory elements that regulate tuft cell  
502 differentiation and function.

503 The identification of OCA-T1 (*Pou2af2*) and OCA-T2 (*Pou2af3*) as POU2F3 co-  
504 factors advanced our understanding of tuft cell differentiation(29, 30). Here we add  
505 isoform usage as another layer of regulation. Together, these findings suggest  
506 interesting avenues for further study. In particular, how do OCA-T1, OCA-T2, and  
507 POU2F3 interact with each other and with other transcription factors thought to play a  
508 role in SI tuft cell differentiation, such as GF11b, SOX4 and ATOH1(41–44)? In cell lines  
509 derived from human tuft-cell-like variants of small-cell lung cancer, deletion of *Pou2af2*  
510 results in decreased *Pou2f3* expression and vice versa, suggesting the two genes may  
511 impact each other's expression(29, 37). Whether this relationship is present in non-  
512 malignant tuft cells in human or mouse still needs to be elucidated. Lastly, our results  
513 from organoids, helminth infection, and succinate stimulation after rIL-25 priming  
514 suggest that unlike homeostatic differentiation, the response of Balb progenitors to IL-13

515 is similar to B6. How *Pou2af2* and *Pou2af3* are regulated in this context remains  
516 unknown.

517 *Pou2af2* isoform usage determines the baseline number of tuft cells, and this  
518 tunes the sensitivity and kinetics of the tuft-ILC2 circuit. During helminth infection, tuft  
519 cells secrete cysLTs, which potently activate ILC2s when paired with IL-25(13).  
520 However, tuft cells do not produce cysLTs when stimulated with succinate(13).  
521 Furthermore, the tuft cell deficit in Balb mice is more pronounced in the distal SI, where  
522 succinate sensing occurs, than in the proximal SI where helminths predominantly reside  
523 (Fig 1B). Ultimately, the integration of baseline tuft cell frequency and strength of signal  
524 sets the threshold for tuft-ILC2 circuit activation. Balb mice have few tuft cells but  
525 perhaps can overcome this defect with IL-25 and cysLT synergy downstream of  
526 helminth sensing. B6 mice likely rely on a higher baseline tuft cell frequency to sense  
527 the weaker, cysLT-independent, succinate signal. As a result, while adaptive immune  
528 responses in Balb mice are indeed skewed towards type 2 immunity, their innate type 2  
529 immune response is attenuated, particularly in the distal SI. Rather than representing a  
530 defect, however, the lower baseline tuft cell frequency in Balb mice may be adaptive.  
531 Balb mice maintain functional responses to helminth pathogens while not expending the  
532 energy to remodel their epithelium in response to commensal protists. To date, no  
533 detrimental effects have been demonstrated in mice that fail to sense *Tritrichomonads*.  
534 Furthermore, the lack of tuft cell hyperplasia in *Tritrichomonas*-colonized Balb mice can  
535 lower their norovirus burden.

536 The link between tuft cells and immunity extends beyond helminth infection and  
537 protist colonization. In addition to expanding the niche for norovirus, acutely activating  
538 the tuft-ILC2 circuit results in worse outcomes for West Nile Virus infection in mice (36,  
539 45). Distal SI tuft cells can also sense bacterial-derived succinate, and in mice, giving  
540 succinate to increase tuft cell frequency reduces inflammation in models of ileitis(11,  
541 46). Perhaps relatedly, in Crohn's disease, tuft cell frequency is lowest in areas of  
542 highest inflammation. Beyond the intestine, tracheal tuft cells sense bacterial ligands  
543 and regulate breathing, mucociliary clearance, and neuroinflammation (47–49). In the  
544 gallbladder, tuft cells prevent inflammation, perhaps by inducing mucus production and  
545 smooth muscle contraction(50, 51). Our data indicate that the Chr9 locus impacts



546 baseline tuft cell frequency in multiple tissues, including the trachea. We expect that  
547 *Pou2af2* isoform usage, and associated tuft cell abundance, would influence tuft cell-  
548 mediated immune responses in these other contexts as well.

549

## 550 **Methods:**

### 551 Experimental Animals

552 Mice aged 6 weeks and older were used for all experiments. Mice were age-matched  
553 within each experiment. Pooled results include both male and female mice of varying  
554 ages unless otherwise indicated. C57BL/6J (B6), and Balb/cJ (Balb) mice were bred in  
555 house or purchased from Jackson Laboratories. C3H/HeJ, FVB/NJ, 129S1/SvImJ and  
556 Swiss Webster mice were purchased from Jackson Laboratories. Congenic mice were  
557 generated and bred in house as described below. All mice were maintained in specific  
558 pathogen-free conditions at the University of Washington and were confirmed to be free  
559 of *Tritrichomonas* by microscopy and qPCR, unless specifically colonized for  
560 experimental purposes. All procedures were conducted within University of Washington  
561 IACUC guidelines under approved protocols.

562

### 563 Quantitative trait locus mapping

564 We performed quantitative trait locus (QTL) mapping of succinate-induced tuft cell  
565 frequency using an F2 intercross between B6 and Balb. We generated Tn5-tagmented  
566 whole-genome sequencing libraries for 84 F2 hybrids and sequenced the samples to a  
567 depth of ~0.05x in a NextSeq 500/550 (75 cycles). Adapters were trimmed using  
568 Trimmomatic v0.36 (Bolger et al. 2014), and reads were aligned to the mm10 reference  
569 genome using BWA-MEM.

570 To impute genotypes, we generated a panel of SNPs between B6 and Balb using  
571 sequence variation data from the Mouse Genomes Project (Adams et al. 2015). SNPs  
572 that passed the following thresholds were included in the panel: MQ  $\geq$  60, DP between  
573 40 and 140, GQ  $\geq$  60, and QUAL > 200. We genotyped each individual at all qualifying  
574 variant positions and conducted genotype imputation using Ancestry-HMM v0.94(52).  
575 Genome-wide genotype probabilities from Ancestry-HMM were used to perform QTL  
576 analysis of succinate-induced tuft cell frequency using R/qtl. The code and results for

577 this analysis are included as Data File S1.

578

### 579 Congenic strain generation

580 We generated four congenic strains through six to eight generations of backcrossing to  
581 Balb to fine map the QTL on chromosome 9. Each generation, libraries were generated,  
582 sequenced, and aligned as described above. Genotypes were imputed using Ancestry-  
583 HMM v0.94. In each cohort, individuals were prioritized for continued backcrossing if  
584 recombination occurred within the congenic interval on chromosome 9. At a minimum,  
585 individuals chosen for breeding retained B6 ancestry in the chr9 locus and contained a  
586 high proportion of Balb ancestry outside the chr9 locus. Because we were unsuccessful  
587 at designing a method in which we could quantify succinate-driven tuft cell hyperplasia  
588 without euthanasia of the mouse, we selected breeders based only on their genotype  
589 and then phenotyped siblings with the same Chr9 genotypes for succinate  
590 responsiveness. After 6-8 generations of backcrossing, each congenic genome was  
591 homozygous for Balb DNA at all locations except the Chr9 locus, where they were  
592 homozygous for B6 DNA.

593

### 594 Succinate Treatment

595 For succinate experiments mice were given 150mM or 250mM sodium succinate  
596 hexahydrate (Thermo) ad libitum in drinking water for the indicated amount of time.

597

### 598 In vivo recombinant cytokine administration

599 IL-4 complexes were generated by incubating 2 µg mouse rIL-4 (R&D Systems) with 10  
600 µg LEAF purified anti-mouse IL4 antibody (clone 11B11, Biolegend) per mouse for 30  
601 min at room temperature. rIL-4 complex or 500ng rIL-25 were given for 3 consecutive  
602 days intraperitoneally in 200 ul PBS.

603

### 604 Mouse Infection and Treatments

605 *H. polygyrus* and *N. brasiliensis* larvae were raised and maintained as previously  
606 described(53, 54). Mice were infected by oral gavage with 200 *H. polygyrus* L3 or  
607 subcutaneously with 500 *N. brasiliensis* L3 and euthanized at the indicated time points

608 to collect tissues for staining and/or to count worm burden. Worm burden was  
609 enumerated across the entire small intestine using a dissection microscope.

610

#### 611 *H. polygyrus* worm fecundity

612 Adapted from a previously described method(55), 12 female worms were isolated from  
613 the proximal 5cm of the small intestine per mouse and individually cultured in 200ul  
614 plain RPMI 1640 with 200 U/mL penicillin and 200 µg/mL streptomycin in 96-well plates  
615 at 37°C. After 24 hours, eggs were counted, and eggs/worm were calculated.

616

#### 617 *H. polygyrus* fecal egg count

618 For fecal egg burdens, 2 to 3 fecal pellets were collected and weighed at time of  
619 euthanasia. Pellets were softened in PBS, homogenized with electric pestle, and  
620 transferred to 5mL H<sub>2</sub>O saturated with NaCl and eggs were counted using a McMaster's  
621 Slide.

622

#### 623 Protist colonization

624 For protist colonization experiments, breeding pairs were colonized with *Tritrichomonas*  
625 *musculis* as previously described(5). Pups from colonized breeding pairs were  
626 analyzed. Protist colonization was quantified by collecting and weighing cecal content at  
627 time of euthanasia, diluting in PBS and counting protists using a hemocytometer.

628

#### 629 Generation of murine norovirus stock

630 Stocks of murine norovirus (MNoV) strain CR6 were generated from molecular clones as  
631 previously describe(56) except for a modified virus concentration protocol. Briefly,  
632 plasmids encoding the viral genomes were transfected into 293T cells to generate  
633 infectious virus, which was subsequently passaged on BV2 cells. After two passages,  
634 BV2 cultures were frozen and thawed to liberate virions. Virus was concentrated by  
635 centrifugation in a 100,000 MWCO ultrafiltration unit (Vivaspin, Sartorius). Titers of virus  
636 stocks were determined by plaque assay on BV2 cells(57).

637

638 MNoV infections, sample collection and quantification

639 Mice received either 150mM sodium succinate or 300mM sodium chloride in the drinking  
640 water for 7 days prior to infection with CR6 and continued to receive treatment water until  
641 time of harvest. 6-week-old mice were orally inoculated with  $10^6$  PFU of CR6 in a volume  
642 of 25 $\mu$ l. 7 days post Cr6 infection tissues and stool were harvested into 2-ml tubes  
643 (Sarstedt) with 1-mm-diameter zirconia/silica beads (Biospec). Samples were frozen and  
644 stored at -80C until RNA extraction. As previously described(58), RNA from tissues was  
645 isolated using TRI Reagent with a Direct-zol-96 RNA kit (Zymo Research) according to  
646 the manufacturer's protocol. 5 $\mu$ l of RNA was used for cDNA synthesis with the ImPromII  
647 reverse transcriptase system (Promega). MNoV TaqMan assays were performed, using  
648 a standard curve for determination of absolute viral genome copies, as described  
649 previously (59). qPCR for housekeeping gene *Rps29* was performed as previously  
650 described (60). All samples were analyzed with technical duplicates.

651

652 Intestinal tissue fixation and staining

653 Intestinal tissues were flushed with PBS and fixed in 4% paraformaldehyde for 4 hours  
654 at 4°C. Tissues were washed with PBS and incubated in 30% (w/v) sucrose overnight at  
655 4°C. Samples were then coiled into “Swiss rolls” and embedded in Optimal Cutting  
656 Temperature Compound (Tissue-Tek) and sectioned at 8  $\mu$ m on a CM1950 cryostat  
657 (Leica). Immunofluorescent staining was performed in PBS with 1% BSA at room  
658 temperature (RT) as follows: 1 h 5% goat serum, 1 h primary antibody ( $\alpha$ DCLK1,  
659 Abcam ab31704), 40 min goat anti-rabbit IgG F(ab')<sub>2</sub>-AF594 secondary antibody  
660 (Invitrogen) and mounted with Vectashield plus DAPI (Vector Laboratories). Images  
661 were acquired with an Axio Observer A1 (Zeiss) microscope with a 10X A Plan  
662 objective. Tuft cell frequency was calculated using ImageJ software to manually quantify  
663 DCLK1<sup>+</sup> cells per millimeter of crypt-villus axis. Four 10x images of the Swiss roll were  
664 analyzed for each replicate and at least 25 total villi were counted.

665

666 Tracheal tuft cell staining and quantification

667 Tracheas were harvested and connective tissue was removed. Tracheas were opened  
668 longitudinally and washed 5 times in 5% FBS/10mM DTT/0.05% Tween-20/HBSS,  
669 vortexing for 5 seconds, to remove mucus. Tracheas were stretched out by pinning to  
670 Sylgard-coated well of 6 well plate and fixed for 1 hr on ice in Cytofix/Cytoperm buffer  
671 (BD Biosciences). Immunofluorescent staining was performed in PBS with 0.25% Triton  
672 X-100 at 4°C as follows: 24 h 10% goat serum, 24 to 36 h primary antibody ( $\alpha$ DCLK1,  
673 Abcam ab31704), 2 h goat anti-rabbit IgG F(ab')<sub>2</sub>-AF488 secondary antibody  
674 (Invitrogen), 15 min DAPI (1:1000), and mounted with Vectashield (Vector  
675 Laboratories). Images were acquired with a Nikon eclipse Ti microscope using a CSU-  
676 W1 spinning disc confocal with a Plan Apo  $\lambda$  20X objective. 5 images were collected per  
677 sample and tuft cells were quantified using QuPath cell detection software.

678

#### 679 Intestinal single-cell tissue preparation

680 For single cell epithelial preparations from small intestines or cecum, tissues were  
681 flushed with PBS, Peyer's patches removed, opened longitudinally, and rinsed with PBS  
682 to remove intestinal contents and mucus. Intestinal tissue was cut into 2-5 cm pieces  
683 and cecum was cut into 5-6 strips. Tissues were incubated rocking at 37°C for 10 min in  
684 10ml HBSS (Ca<sup>+2</sup>/Mg<sup>+2</sup>-free) supplemented with 3mM EDTA and 1mM HEPES. Tissues  
685 were vortexed thoroughly and released epithelial cells were passed through a 70  $\mu$ m  
686 filter. Tissues were then incubated in fresh EDTA/HBSS solution and incubation,  
687 vortexing and filtering was repeated for a total of 3 rounds. Supernatants were pooled  
688 and washed once before staining for flow cytometry.

689 For lamina propria preparations, small intestinal tissue was processed as above  
690 to remove the epithelial fraction. Tissues were then incubated in 10ml RPMI 1640  
691 supplemented with 20% FCS, 1mM HEPES, 0.05 mg/ml DNase I (Sigma Aldrich), and 1  
692 mg/mL Collagenase A (Sigma Aldrich), shaking at 37°C for 30 minutes. Tissues were  
693 vortexed and cells were passed through a 100  $\mu$ m filter, then a 40  $\mu$ m filter. Cells were  
694 then washed and stained for flow cytometry.

695

#### 696 Thymus single-cell tissue preparation

697 For thymus epithelial preparations, protocol was adapted from previously described  
698 procedure(2). Briefly, thymi cleaned of fat were minced with a razor blade. Tissue was  
699 incubated in 37°C water bath for 12 min in 4 ml of digestion medium containing 2%  
700 FBS, 100 µ/ml DNase I (Sigma Aldrich) and 100 µ/ml liberase TM (Sigma Aldrich) in  
701 DMEM. At 12 min, tubes were spun briefly to pellet undigested fragments and the  
702 supernatant was moved to 20 ml of 0.5% BSA, 2 mM EDTA in PBS on ice. The  
703 DNase/Liberase digestion was repeated twice for a total of three 12-min digestion  
704 cycles. The single-cell suspension was pooled, pelleted and resuspended in 50%  
705 Percoll (Sigma Aldrich), underlaid with 90% Percoll, and centrifuged at 2,000 rpm for 15  
706 min at 20°C. The 50/90 interphase of the Percoll gradient was collected, washed, and  
707 stained for flow cytometry as described below.

708

#### 709 Organoid Culture

710 Small intestinal crypt-derived organoids were grown as described with modifications  
711 described below(61). Briefly, distal small intestine was isolated and villi manually  
712 scraped off with a glass coverslip. Tissue was then washed three times in cold PBS  
713 with vigorous shaking before 30 minute 4 °C incubation in 2mM EDTA to release  
714 epithelial crypts, which were washed in PBS and filtered through a 70 µm strainer.  
715 Pelleted crypts were resuspended in Matrigel and plated at 400-500 crypts per well in a  
716 prewarmed plate, incubated at 37°C for 5 minutes to allow for Matrigel solidification, and  
717 complete organoid media added. Organoid media was composed of DMEM/F12  
718 supplemented with 2mM glutamine, 100 U/mL penicillin, 100mg/mL streptomycin,  
719 100ug/mL Normacin (InvivoGen), 10mM HEPES, 1X N2 supplement (Life  
720 Technologies), 1X B27 supplement (Life Technologies), 500mM N-acetylcysteine,  
721 50µg/ml mEGF, and replacing recombinant R-spondin with supernatants from R-  
722 spondin expressing L-cells and replacing recombinant Noggin with supernatants from  
723 Noggin expressing cells. Crypts were harvested from distal (last 10cm) small intestine  
724 of naive mice and plated on day 0. On day 3 and day 5, media was replaced.  
725 Organoids were treated with 2.5 ng/ml recombinant IL-13 on day 1, 3 and 5. On day 7  
726 organoids were harvested for passage or analysis. Organoids were passaged by  
727 washing in room temperature PBS to remove Matrigel. Next, organoids were sheared

728 with a 28G insulin syringe, washed and resuspended in fresh Matrigel. Generally,  
729 organoids were passaged at 1 well to 3-5 well ratio depending on number of  
730 organoids present.

731 For flow cytometry, organoids were resuspended in 1X TrypLE (Gibco).  
732 Organoids were sheared with a 28G insulin syringe, incubated for 10min at room  
733 temperature, cells washed, and then stained for flow cytometry as described below.  
734 Tuft cells were identified as CD45<sup>-</sup> EpCAM<sup>+</sup> CD24<sup>+</sup> DCLK1<sup>+</sup>. For qPCR, organoids  
735 were incubated in Cell Recovery Solution (Corning) for 30 min at 4°C to remove  
736 Matrigel. Organoids were washed 2 times with PBS, pelleted and resuspended in RLT  
737 Plus buffer. RNA was isolated using the Mini Plus RNeasy kit (Qiagen) following  
738 manufacture's protocol.

739

#### 740 Flow cytometry and cell sorting

741 Single cell suspensions from tissues or organoids were prepared as described above.  
742 For flow cytometry, samples were stained with Zombie Violet (BioLegend) in PBS for  
743 live/dead exclusion and stained in PBS + 3% FBS with antibodies to surface markers.  
744 Next, cells were fixed and permeabilized using the eBioscience™ Foxp3 / Transcription  
745 Factor Staining Buffer Set, following manufacturer's instructions for staining either  
746 cytosolic proteins (DCLK1) or nuclear proteins (GATA3 and Ki67). When cell counts  
747 were needed, counting beads (Invitrogen) were added prior to running flow cytometry.  
748 Samples were run on a Canto RUO or Symphony A3 (BD Biosciences) and analyzed  
749 with FlowJo 10 (Tree Star). Samples were FSC-A/SSC-A gated to exclude debris, FSC-  
750 A/FSC-H gated to select single cells and gated to exclude dead cells.

751 For cell sorting of ILC2s or tuft cells, single cell suspensions were prepared as  
752 described above. Cells were stained in PBS + 3% FBS with antibodies to surface  
753 markers and stained with DAPI for live/dead exclusion. Samples were sorted on an Aria  
754 II (BD Biosciences). Samples were FSC-A/SSC-A gated to exclude debris, FSC-A/FSC-  
755 H gated to select single cells and gated to exclude dead cells.

756

#### 757 ILC2 Stimulation Assay

758 Small intestinal lamina propria ILC2s were isolated from mice and sorted as described.  
759 Sorted cells were plated at 5000 cells per well in a 96 well plate and incubated at 37°C  
760 overnight in 10 ng/ml IL-7 (R&D Systems) and basal media composed of high glucose  
761 DMEM supplemented with non-essential amino acids, 10% FBS, 100 U/mL penicillin,  
762 100mg/mL streptomycin, 10mM HEPES, 1mM sodium pyruvate, 100µM 2-  
763 mercaptoethanol, and 2mM L-glutamine. The next morning, media was replaced with  
764 fresh media and 10 ng/ml IL-7, and cells were stimulated with the indicated agonist.  
765 After a six-hour stimulation at 37°C, supernatant was collected and analyzed by  
766 cytokine bead array as described below. Cells were resuspended in fresh basal media  
767 with 10ng/ml IL-7 and incubated for an additional 48 hrs. Cells were washed, stained for  
768 intracellular Ki67 as described above. Cytokine levels in supernatants collected from  
769 cultured ILC2s were measured using Enhanced Sensitivity Flex Sets (BD Biosciences)  
770 for mouse IL-5 and IL-13 according to the manufacturer's protocol. Data was collected  
771 on a LSR II (BD Biosciences).

772

### 773 Quantitative RT-PCR

774 Crypts from distal small intestine were isolated as described in the organoid culture  
775 methods. After filtering crypt suspension with 70 µm filter, crypts were washed in PBS  
776 two times, pelleted and resuspended in RLT Buffer. RNA was isolated using the Mini  
777 Plus RNeasy kit (Qiagen) according to manufacturer's instructions and reverse  
778 transcribed using SuperScript II (Thermo) following manufactures' protocol. cDNA was  
779 used as template for quantitative PCR with PowerUP SYBR Green (Thermo) on a Via7  
780 cyclor (Applied Biosystems). Transcripts were normalized to *Rps17* (40S ribosomal  
781 protein S17) expression. Primer sequences listed in Table S2.

782

### 783 RNA Sequencing and Analysis

784 150 tuft cells were sorted as CD45<sup>lo</sup> EpCAM<sup>+</sup>SigF<sup>+</sup>CD24<sup>+</sup> directly into lysis buffer from  
785 the SMART-Seq v4 Ultra Low Input RNA Kit (Takara) and cDNA was generated  
786 following manufacturer's instructions. Four biological replicates were collected for each  
787 genotype. Each biological replicate represents one mouse. Next-generation sequencing  
788 was performed by the Benaroya Research Institute Genomics Core. Sequencing



789 libraries were generated using the Nextera XT library preparation kit with multiplexing  
790 primers, according to manufacturer's protocol (Illumina), and library quality was  
791 assessed using the TapeStation (Agilent). High throughput sequencing was performed  
792 on NextSeq 2000 (Illumina), sequencing dual-indexed and paired-end 59 base pair  
793 reads. All samples were in the same run with target depth of 5 million reads to reach  
794 adequate depth of coverage.

795 Processing and analysis of the raw sequencing reads was performed using the  
796 DIY.Transcriptomics ([diytranscriptomics.com](http://diytranscriptomics.com)) pipeline, with experiment-specific  
797 modifications. Raw reads were mapped to the mouse reference transcriptome  
798 using [Kallisto](#), version 0.46.2. The quality of raw reads, as well as the results of Kallisto  
799 mapping were analyzed using [fastqc](#) and [multiqc](#). Kallisto outputs were read into an R  
800 environment and annotated using Biomart. Samples were filtered to exclude genes with  
801 counts per million = 0 in 4 or more samples and genes annotated as pseudogenes.  
802 Finally, samples were normalized to each other. To identify differentially expressed  
803 genes, precision weights were first applied to each gene based on its mean-variance  
804 relationship using [VOOM](#), then data was normalized using the [TMM method](#) in [EdgeR](#).  
805 Linear modeling and bayesian stats were employed via [Limma](#) to find genes that were  
806 up- or down-regulated by 2-fold or more, with a false-discovery rate (FDR) of 0.05. The  
807 code and results for this analysis are included as Data File S2.

808

#### 809 5' rapid amplification of cDNA ends

810 RNA isolated from distal SI crypts was obtained as described above. For 5' rapid  
811 amplification of cDNA ends assay, the SMARTer RACE 5'/3' Kit (Takara) was used  
812 following manufacturer's protocol and using the following primer:

813 5'-GATTACGCCAAGCTTGGTGGGCGGTAGTCTCCATAGGGCTCAGC-3'.

814

#### 815 Quantification and Statistical Analysis

816 All experiments were performed using randomly assigned mice without investigator  
817 blinding. All data points and "n" values reflect biological replicates (i.e. mice). No data  
818 were excluded. Statistical analysis was performed as noted in figure legends using  
819 Prism 7 (GraphPad) software. Graphs show mean +/- SEM.

820

821 **References:**

- 822 1. C. E. O’Leary, C. Schneider, R. M. Locksley, Tuft Cells-Systemically Dispersed  
823 Sensory Epithelia Integrating Immune and Neural Circuitry. *Annu. Rev. Immunol.* **37**,  
824 47–72 (2019).
- 825 2. C. N. Miller, I. Proekt, J. von Moltke, K. L. Wells, A. R. Rajpurkar, H. Wang, K. Rattay,  
826 I. S. Khan, T. C. Metzger, J. L. Pollack, A. C. Fries, W. W. Lwin, E. J. Wigton, A. V.  
827 Parent, B. Kyewski, D. J. Erle, K. A. Hogquist, L. M. Steinmetz, R. M. Locksley, M. S.  
828 Anderson, Thymic tuft cells promote an IL-4-enriched medulla and shape thymocyte  
829 development. *Nature* **559**, 627–631 (2018).
- 830 3. C. Bornstein, S. Nevo, A. Giladi, N. Kadouri, M. Pouzolles, F. Gerbe, E. David, A.  
831 Machado, A. Chuprin, B. Tóth, O. Goldberg, S. Itzkovitz, N. Taylor, P. Jay, V. S.  
832 Zimmermann, J. Abramson, I. Amit, Single-cell mapping of the thymic stroma identifies  
833 IL-25-producing tuft epithelial cells. *Nat. 2018 5597715* **559**, 622–626 (2018).
- 834 4. C. Bezençon, A. Fürholz, F. Raymond, R. Mansourian, S. Métairon, J. Le Coutre, S.  
835 Damak, Murine intestinal cells expressing Trpm5 are mostly brush cells and express  
836 markers of neuronal and inflammatory cells. *J. Comp. Neurol.* **509**, 514–525 (2008).
- 837 5. M. S. Nadsombati, J. W. McGinty, M. R. Lyons-Cohen, J. B. Jaffe, L. DiPeso, C.  
838 Schneider, C. N. Miller, J. L. Pollack, G. A. Nagana Gowda, M. F. Fontana, D. J. Erle,  
839 M. S. Anderson, R. M. Locksley, D. Raftery, J. von Moltke, Detection of Succinate by  
840 Intestinal Tuft Cells Triggers a Type 2 Innate Immune Circuit. *Immunity* **49**, 33-41.e7  
841 (2018).
- 842 6. N. Barker, Adult intestinal stem cells: Critical drivers of epithelial homeostasis and  
843 regeneration *Nat. Rev. Mol. Cell Biol.* **15**, 19–33 (2014).
- 844 7. F. Gerbe, E. Sidot, D. J. Smyth, M. Ohmoto, I. Matsumoto, V. Dardalhon, P. Cesses,  
845 L. Garnier, M. Pouzolles, B. Brulin, M. Bruschi, Y. Harcus, V. S. Zimmermann, N.  
846 Taylor, R. M. Maizels, P. Jay, Intestinal epithelial tuft cells initiate type 2 mucosal  
847 immunity to helminth parasites. *Nature* **529**, 226–230 (2016).
- 848 8. J. von Moltke, M. Ji, H.-E. Liang, R. M. Locksley, Tuft-cell-derived IL-25 regulates an  
849 intestinal ILC2–epithelial response circuit. *Nature* **529**, 221–225 (2016).
- 850 9. M. R. Howitt, S. Lavoie, M. Michaud, A. M. Blum, S. V Tran, J. V Weinstock, C. A.  
851 Gallini, K. Redding, R. F. Margolskee, L. C. Osborne, D. Artis, W. S. Garrett, Tuft cells,  
852 taste-chemosensory cells, orchestrate parasite type 2 immunity in the gut. *Science* (80-  
853 ). **351**, 1329–1333 (2016).
- 854 10. C. Schubart, B. Krljanac, M. Otte, C. Symowski, E. Martini, C. Günther, C. Becker,  
855 C. Daniel, D. Voehringer, Selective expression of constitutively activated STAT6 in  
856 intestinal epithelial cells promotes differentiation of secretory cells and protection  
857 against helminths. *Mucosal Immunol.* 2018 122 **12**, 413–424 (2018).
- 858 11. W. Lei, W. Ren, M. Ohmoto, J. F. Urban, I. Matsumoto, R. F. Margolskee, P. Jiang,  
859 Activation of intestinal tuft cell-expressed *Sucnr1* triggers type 2 immunity in the mouse  
860 small intestine. *Proc. Natl. Acad. Sci. U. S. A.* **115**, 5552–5557 (2018).

- 861 12. C. Schneider, C. E. O’Leary, J. von Moltke, H.-E. Liang, Q. Y. Ang, P. J. Turnbaugh,  
862 S. Radhakrishnan, M. Pellizzon, A. Ma, R. M. Locksley, A Metabolite-Triggered Tuft  
863 Cell-ILC2 Circuit Drives Small Intestinal Remodeling. *Cell* **174**, 271-284.e14 (2018).
- 864 13. J. W. McGinty, H. A. Ting, T. E. Billipp, M. S. Nadsombati, D. M. Khan, N. A.  
865 Barrett, H. E. Liang, I. Matsumoto, J. von Moltke, Tuft-Cell-Derived Leukotrienes Drive  
866 Rapid Anti-helminth Immunity in the Small Intestine but Are Dispensable for Anti-protist  
867 Immunity. *Immunity* **52**, 528-541.e7 (2020).
- 868 14. F. P. Heinzel, M. D. Sadick, B. J. Holaday, R. L. Coffman, R. M. Locksley,  
869 Reciprocal expression of interferon  $\gamma$  or interleukin 4 during the resolution or  
870 progression of murine leishmaniasis. Evidence for expansion of distinct helper T cell  
871 subsets. *J. Exp. Med.* **169**, 59–72 (1989).
- 872 15. R. M. Locksley, P. Scott, Helper T-cell subsets in mouse leishmaniasis: induction,  
873 expansion and effector function. *Immunol. Today* **12**, A58–A61 (1991).
- 874 16. W. Hartmann, B. Blankenhaus, M. L. Brunn, J. Meiners, M. Breloer, Elucidating  
875 different pattern of immunoregulation in BALB/c and C57BL/6 mice and their F1  
876 progeny. *Sci. Rep.* **11**, 1–14 (2021).
- 877 17. K. J. Filbey, J. R. Grainger, K. A. Smith, L. Boon, N. Van Rooijen, Y. H Marcus, S.  
878 Jenkins, J. P. Hewitson, R. M. Maizels, Innate and adaptive type 2 immune cell  
879 responses in genetically controlled resistance to intestinal helminth infection. *Immunol.*  
880 *Cell Biol.* **92**, 436–448 (2014).
- 881 18. L. A. Reynolds, K. A. Smith, K. J. Filbey, Y. H Marcus, J. P. Hewitson, S. A. Redpath,  
882 Y. Valdez, M. J. Yebra, B. Brett Finlay, R. M. Maizels, Commensal-pathogen  
883 interactions in the intestinal tract lactobacilli promote infection with, and are promoted  
884 by, helminth parasites. *Gut Microbes* **5**, 522–532 (2014).
- 885 19. J. M. Behnke, F. A. Iraqi, J. M. Mugambi, S. Clifford, S. Nagda, D. Wakelin, S. J.  
886 Kemp, R. L. Baker, J. P. Gibson, High resolution mapping of chromosomal regions  
887 controlling resistance to gastrointestinal nematode infections in an advanced intercross  
888 line of mice. *Mamm. Genome* **17**, 584–597 (2006).
- 889 20. J. D. Gorham, M. L. Güler, R. G. Steen, A. J. Mackey, M. J. Daly, K. Frederick, W.  
890 F. Dietrich, K. M. Murphy, Genetic mapping of a marine locus controlling development  
891 of T helper 1/T helper 2 type responses. *Proc. Natl. Acad. Sci. U. S. A.* **93**, 12467–  
892 12472 (1996).
- 893 21. C. S. Hsieh, S. E. Macatonia, A. O’Garra, K. M. Murphy, T cell genetic background  
894 determines default t helper phenotype development in vitro. *J. Exp. Med.* **181**, 713–721  
895 (1995).
- 896 22. M. R. Howitt, Y. G. Cao, M. B. Gologorsky, J. A. Li, A. L. Haber, M. Biton, J. Lang,  
897 M. Michaud, A. Regev, W. S. Garrett, The Taste Receptor TAS1R3 Regulates Small  
898 Intestinal Tuft Cell Homeostasis. *ImmunoHorizons* **4**, 23–32 (2020).
- 899 23. S. Laffont, E. Blanquart, M. Savignac, C. Cénac, G. Laverny, D. Metzger, J. P.  
900 Girard, G. T. Belz, L. Pelletier, C. Seillet, J. C. Guéry, Androgen signaling negatively  
901 controls group 2 innate lymphoid cells. *J. Exp. Med.* **214**, 1581–1592 (2017).
- 902 24. L. Mathä, H. Shim, C. A. Steer, Y. H. Yin, I. Martinez, G. Fumio Takei, Female and

- 903 male mouse lung group 2 innate lymphoid cells differ in gene expression profiles and  
904 cytokine production. *PLoS One* **14** (2019), doi:10.1371/journal.pone.0214286.
- 905 25. J. Y. Cephus, M. T. Stier, H. Fuseini, J. A. Yung, S. Toki, M. H. Bloodworth, W.  
906 Zhou, K. Goleniewska, J. Zhang, S. L. Garon, R. G. Hamilton, V. V. Poloshukin, K. L.  
907 Boyd, R. S. Peebles, D. C. Newcomb, Testosterone Attenuates Group 2 Innate  
908 Lymphoid Cell-Mediated Airway Inflammation. *Cell Rep.* **21**, 2487–2499 (2017).
- 909 26. C. Wang, Z. Bin Xu, Y. Q. Peng, H. Y. Zhang, Q. N. Yu, Y. B. Guo, W. P. Tan, Y. L.  
910 Liu, X. C. Meng, S. Bin Fang, D. Chen, Q. L. Fu, Sex differences in group 2 innate  
911 lymphoid cell-dominant allergic airway inflammation. *Mol. Immunol.* **128**, 89–97 (2020).
- 912 27. S. Kadel, E. Ainsua-Enrich, I. Hatipoglu, S. Turner, S. Singh, S. Khan, S. Kovats, A  
913 Major Population of Functional KLRG1 – ILC2s in Female Lungs Contributes to a Sex  
914 Bias in ILC2 Numbers. *ImmunoHorizons* **2**, 74–86 (2018).
- 915 28. S. Picelli, Å. K. Björklund, B. Reinius, S. Sagasser, G. Winberg, R. Sandberg, Tn5  
916 transposase and tagmentation procedures for massively scaled sequencing projects.  
917 *Genome Res.* **24**, 2033–2040 (2014).
- 918 29. X. S. Wu, X. Y. He, J. J. Ipsaro, Y. H. Huang, J. B. Preall, D. Ng, Y. T. Shue, J.  
919 Sage, M. Egeblad, L. Joshua-Tor, C. R. Vakoc, OCA-T1 and OCA-T2 are coactivators  
920 of POU2F3 in the tuft cell lineage. *Nature* **607**, 169–175 (2022).
- 921 30. A. P. Szczepanski, N. Tsuboyama, J. Watanabe, R. Hashizume, Z. Zhao, L. Wang,  
922 POU2AF2/C11orf53 functions as a coactivator of POU2F3 by maintaining chromatin  
923 accessibility and enhancer activity. *Sci. Adv.* **8**, 2403 (2022).
- 924 31. D. B. Schubart, A. Rolink, M. H. Kosco-Vilbois, F. Botteri, P. Matthias, B-cell-specif  
925 ic coactivator OBF-1/OCA-B/Bob1 required for immune response and germinal centre  
926 formation. *Nature* **383**, 538–542 (1996).
- 927 32. D. Chasman, K. Cepek, P. A. Sharp, C. O. Pabo, Crystal structure of an OCA-B  
928 peptide bound to an Oct-1 POU domain/octamer DNA complex: specific recognition of a  
929 protein-DNA interface. (1999) (available at [www.genesdev.org](http://www.genesdev.org)).
- 930 33. J. M. Behnke, J. M. Mugambi, S. Clifford, F. A. Iraqi, R. L. Baker, J. P. Gibson, D.  
931 Wakelin, Genetic variation in resistance to repeated infections with *Heligmosomoides*  
932 *polygyrus bakeri*, in inbred mouse strains selected for the mouse genome project.  
933 *Parasite Immunol.* **28**, 85–94 (2006).
- 934 34. W. Wojciechowski, D. P. Harris, F. Sprague, B. Mousseau, M. Makris, K. Kusser, T.  
935 Honjo, K. Mohrs, M. Mohrs, T. Randall, F. E. Lund, Cytokine-Producing Effector B Cells  
936 Regulate Type 2 Immunity to *H. polygyrus*. *Immunity* **30**, 421–433 (2009).
- 937 35. R. M. Anthony, J. F. Urban, F. Alem, H. A. Hamed, C. T. Roza, J. L. Boucher, N.  
938 Van Rooijen, W. C. Gause, Memory TH2 cells induce alternatively activated  
939 macrophages to mediate protection against nematode parasites. *Nat. Med.* **2006** *128*  
940 **12**, 955–960 (2006).
- 941 36. C. B. Wilen, S. Lee, L. L. Hsieh, R. C. Orchard, C. Desai, B. L. Hykes, M. R.  
942 McAllaster, D. R. Balce, T. Feehley, J. R. Brestoff, C. A. Hickey, C. C. Yokoyama, Y.-T.  
943 Wang, D. A. MacDuff, D. Krealmalmayer, M. R. Howitt, J. A. Neil, K. Cadwell, P. M.  
944 Allen, S. A. Handley, M. van Lookeren Campagne, M. T. Baldridge, H. W. Virgin,

- 945 Tropism for tuft cells determines immune promotion of norovirus pathogenesis. *Science*  
946 **360**, 204–208 (2018).
- 947 37. Y. H. Huang, O. Klingbeil, X. Y. He, X. S. Wu, G. Arun, B. Lu, T. D. D. Somerville, J.  
948 P. Milazzo, J. E. Wilkinson, O. E. Demerdash, D. L. Spector, M. Egeblad, J. Shi, C. R.  
949 Vakoc, POU2F3 is a master regulator of a tuft cell-like variant of small cell lung cancer.  
950 *Genes Dev.* **32**, 915–928 (2018).
- 951 38. N. Goto, A. Fukuda, Y. Yamaga, T. Yoshikawa, T. Maruno, H. Maekawa, S.  
952 Inamoto, K. Kawada, Y. Sakai, H. Miyoshi, M. M. Taketo, T. Chiba, H. Seno, Lineage  
953 tracing and targeting of IL17RB+ tuft cell-like human colorectal cancer stem cells. *Proc.*  
954 *Natl. Acad. Sci. U. S. A.* **116**, 12996–13005 (2019).
- 955 39. A. Tenesa, S. M. Farrington, J. G. D. Prendergast, M. E. Porteous, M. Walker, N.  
956 Haq, R. A. Barnetson, E. Theodoratou, R. Cetnarskyj, N. Cartwright, C. Semple, A. J.  
957 Clark, F. J. L. Reid, L. A. Smith, K. Kavoussanakis, T. Koessler, P. D. P. Pharoah, S.  
958 Buch, C. Schafmayer, J. Tepel, S. Schreiber, H. Völzke, C. O. Schmidt, J. Hampe, J.  
959 Chang-Claude, M. Hoffmeister, H. Brenner, S. Wilkening, F. Canzian, G. Capella, V.  
960 Moreno, I. J. Deary, J. M. Starr, I. P. M. Tomlinson, Z. Kemp, K. Howarth, L. Carvajal-  
961 Carmona, E. Webb, P. Broderick, J. Vijayakrishnan, R. S. Houlston, G. Rennert, D.  
962 Ballinger, L. Rozek, S. B. Gruber, K. Matsuda, T. Kidokoro, Y. Nakamura, B. W. Zanke,  
963 C. M. T. Greenwood, J. Rangrej, R. Kustra, A. Montpetit, T. J. Hudson, S. Gallinger, H.  
964 Campbell, M. G. Dunlop, Genome-wide association scan identifies a colorectal cancer  
965 susceptibility locus on 11q23 and replicates risk loci at 8q24 and 18q21. *Nat. Genet.* **40**,  
966 631 (2008).
- 967 40. B. T. Harris, V. Rajasekaran, J. P. Blackmur, A. O’Callaghan, K. Donnelly, M.  
968 Timofeeva, P. G. Vaughan-Shaw, F. V. N. Din, M. G. Dunlop, S. M. Farrington,  
969 Transcriptional dynamics of colorectal cancer risk associated variation at 11q23.1  
970 correlate with tuft cell abundance and marker expression in silico. *Sci. Reports 2022*  
971 *121* **12**, 1–13 (2022).
- 972 41. F. Gerbe, J. H. Van Es, L. Makrini, B. Brulin, G. Mellitzer, S. Robine, B. Romagnolo,  
973 N. F. Shroyer, J. F. Bourgaux, C. Pignodel, H. Clevers, P. Jay, Distinct ATOH1 and  
974 Neurog3 requirements define tuft cells as a new secretory cell type in the intestinal  
975 epithelium. *J. Cell Biol.* **192**, 767–780 (2011).
- 976 42. A. D. Gracz, L. A. Samsa, M. J. Fordham, D. C. Trotier, B. Zwarycz, Y. H. Lo, K.  
977 Bao, J. Starmer, J. R. Raab, N. F. Shroyer, R. L. Reinhardt, S. T. Magness, Sox4  
978 Promotes Atoh1-Independent Intestinal Secretory Differentiation Toward Tuft and  
979 Enteroendocrine Fates. *Gastroenterology* **155**, 1508-1523.e10 (2018).
- 980 43. C. A. Herring, A. Banerjee, E. T. McKinley, A. J. Simmons, J. Ping, J. T. Roland, J.  
981 L. Franklin, Q. Liu, M. J. Gerdes, R. J. Coffey, K. S. Lau, Unsupervised Trajectory  
982 Analysis of Single-Cell RNA-Seq and Imaging Data Reveals Alternative Tuft Cell Origins  
983 in the Gut. *Cell Syst.* **6**, 37-51.e9 (2018).
- 984 44. M. Bjerknes, C. Khandanpour, T. Möröy, T. Fujiyama, M. Hoshino, T. J. Klisch, Q.  
985 Ding, L. Gan, J. Wang, M. G. Martín, H. Cheng, Origin of the brush cell lineage in the  
986 mouse intestinal epithelium. *Dev. Biol.* **362**, 194–218 (2012).
- 987 45. P. Desai, H. Janova, J. P. White, T. S. Stappenbeck, L. B. Thackray, M. S. Diamond

- 988 Correspondence, G. V Reynoso, H. D. Hickman, M. T. Baldrige, J. F. Urban, M. S.  
989 Diamond, Enteric helminth coinfection enhances host susceptibility to neurotropic  
990 flaviviruses via a tuft cell-IL-4 receptor signaling axis. *Cell* **184** (2021),  
991 doi:10.1016/j.cell.2021.01.051.
- 992 46. A. Banerjee, C. A. Herring, B. Chen, H. Kim, A. J. Simmons, A. N. Southard-Smith,  
993 M. M. Allaman, J. R. White, M. C. Macedonia, E. T. Mckinley, M. A. Ramirez Solano, E.  
994 A. Scoville, Q. Liu, K. T. Wilson, R. J. Coffey, M. K. Washington, J. A. Goettel, K. S.  
995 Lau, Succinate Produced by Intestinal Microbes Promotes Specification of Tuft Cells to  
996 Suppress Ileal Inflammation. *Gastroenterology* **0** (2020),  
997 doi:10.1053/j.gastro.2020.08.029.
- 998 47. G. Krasteva, B. J. Canning, P. Hartmann, T. Z. Veres, T. Papadakis, C. Mühlfeld, K.  
999 Schliecker, Y. N. Tallini, A. Braun, H. Hackstein, N. Baal, E. Weihe, B. Schütz, M.  
1000 Kotlikoff, I. Ibanez-Tallon, W. Kummer, Cholinergic chemosensory cells in the trachea  
1001 regulate breathing. *Proc. Natl. Acad. Sci. U. S. A.* **108**, 9478–9483 (2011).
- 1002 48. A. Perniss, S. Liu, B. Boonen, M. Keshavarz, A. L. Ruppert, T. Timm, U. Pfeil, A.  
1003 Soultanova, S. Kusumakshi, L. Delventhal, Ö. Aydin, M. Pyrski, K. Deckmann, T. Hain,  
1004 N. Schmidt, C. Ewers, A. Günther, G. Lochnit, V. Chubanov, T. Gudermann, J.  
1005 Oberwinkler, J. Klein, K. Mikoshiba, T. Leinders-Zufall, S. Offermanns, B. Schütz, U.  
1006 Boehm, F. Zufall, B. Bufe, W. Kummer, Chemosensory Cell-Derived Acetylcholine  
1007 Drives Tracheal Mucociliary Clearance in Response to Virulence-Associated Formyl  
1008 Peptides. *Immunity* **52**, 683-699.e11 (2020).
- 1009 49. M. I. Hollenhorst, I. Jurastow, R. Nandigama, S. Appenzeller, L. Li, J. Vogel, S.  
1010 Wiederhold, M. Althaus, M. Empting, J. Altmüller, A. K. H. Hirsch, V. Flockerzi, B. J.  
1011 Canning, A. E. Saliba, G. Krasteva-Christ, Tracheal brush cells release acetylcholine in  
1012 response to bitter tastants for paracrine and autocrine signaling. *FASEB J.* **34**, 316–332  
1013 (2020).
- 1014 50. M. Keshavarz, S. F. Tabrizi, A.-L. Ruppert, U. Pfeil, Y. Schreiber, J. Klein, I.  
1015 Brandenburger, G. Lochnit, S. Bhushan, A. Perniss, K. Deckmann, P. Hartmann, M.  
1016 Meiners, P. Mermer, A. Rafiq, S. Winterberg, T. Papadakis, D. Thomas, C. Angioni, J.  
1017 Oberwinkler, V. Chubanov, T. Gudermann, U. Gärtner, S. Offermanns, B. Schütz, W.  
1018 Kummer, Cysteinyl leukotrienes and acetylcholine are biliary tuft cell cotransmitters. *Sci.*  
1019 *Immunol.* **7**, 6734 (2022).
- 1020 51. C. E. O’Leary, J. Sbierski-Kind, M. E. Kotas, J. C. Wagner, H.-E. Liang, A. W.  
1021 Schroeder, J. C. de Tenorio, J. von Moltke, R. R. Ricardo-Gonzalez, W. L. Eckalbar, A.  
1022 B. Molofsky, C. Schneider, R. M. Locksley, Bile acid–sensitive tuft cells regulate biliary  
1023 neutrophil influx. *Sci. Immunol.* **7**, 1080 (2022).
- 1024 52. R. Corbett-Detig, R. Nielsen, A Hidden Markov Model Approach for Simultaneously  
1025 Estimating Local Ancestry and Admixture Time Using Next Generation Sequence Data  
1026 in Samples of Arbitrary Ploidy. *PLoS Genet.* **13** (2017),  
1027 doi:10.1371/journal.pgen.1006529.
- 1028 53. C. J. C. Johnston, E. Robertson, Y. Harcus, J. R. Grainger, G. Coakley, D. J. Smyth,  
1029 H. J. Mcsorley, R. Maizels, C. : Johnston, C. J. Robertson, J. R. Coakley, G. Smyth, D.  
1030 J. Mcsorley, Cultivation of Heligmosomoides Polygyrus: An Immunomodulatory  
1031 Nematode Parasite and its Secreted Products. *J. Vis. Exp* , 52412 (2015).

- 1032 54. D. Voehringer, T. A. Reese, X. Huang, K. Shinkai, R. M. Locksley, Type 2 immunity  
1033 is controlled by IL-4/IL-13 expression in hematopoietic non-eosinophil cells of the innate  
1034 immune system. *J. Exp. Med.* **203**, 1435–1446 (2006).
- 1035 55. S. Steinfeldt, S. Rausch, D. Michael, A. A. Kühl, S. Hartmann, Immunity to  
1036 infection Intestinal helminth infection induces highly functional resident memory CD4 + T  
1037 cells in mice. *Eur. J. Immunol* **47**, 353–363 (2017).
- 1038 56. D. W. Strong, L. B. Thackray, T. J. Smith, H. W. Virgin, Protruding Domain of  
1039 Capsid Protein Is Necessary and Sufficient To Determine Murine Norovirus Replication  
1040 and Pathogenesis In Vivo . *J. Virol.* **86**, 2950–2958 (2012).
- 1041 57. K. A. Chachu, A. D. LoBue, D. W. Strong, R. S. Baric, H. W. Virgin, Immune  
1042 Mechanisms Responsible for Vaccination against and Clearance of Mucosal and  
1043 Lymphatic Norovirus Infection. *PLOS Pathog.* **4**, e1000236 (2008).
- 1044 58. M. T. Baldrige, S. Lee, J. J. Brown, N. McAllister, K. Urbanek, T. S. Dermody, T. J.  
1045 Nice, H. W. Virgin, Expression of Ifnlr1 on Intestinal Epithelial Cells Is Critical to the  
1046 Antiviral Effects of Interferon Lambda against Norovirus and Reovirus . *J. Virol.* **91**,  
1047 2079–2095 (2017).
- 1048 59. L. Baert, C. E. Wobus, E. Van Coillie, L. B. Thackray, J. Debevere, M. Uyttendaele,  
1049 Detection of murine norovirus 1 by using plaque assay, transfection assay, and real-  
1050 time reverse transcription-PCR before and after heat exposure. *Appl. Environ. Microbiol.*  
1051 **74**, 543–546 (2008).
- 1052 60. M. T. Baldrige, T. J. Nice, B. T. McCune, C. C. Yokoyama, A. Kambal, M.  
1053 Wheadon, M. S. Diamond, Y. Ivanova, M. Artyomov, H. W. Virgin, Commensal  
1054 microbes and interferon- $\lambda$  determine persistence of enteric murine norovirus infection.  
1055 *Science (80-. )*. **347**, 266–269 (2015).
- 1056 61. T. Sato, H. Clevers, Primary mouse small intestinal epithelial cell cultures. *Methods*  
1057 *Mol. Biol.* **945**, 319–328 (2013).

1058

## 1059 **Acknowledgements:**

1060 We thank all members of the von Moltke lab for helpful discussion and input on this  
1061 manuscript. We thank D. Hailey and the Garvey Cell Imaging Lab in the Institute for  
1062 Stem Cell & Regenerative Medicine for microscopy support; the mouse husbandry staff  
1063 in the UW SLU vivarium; V. Gersuk, K. O'Brien and the Benaroya Research Institute  
1064 Genomics Core for help with RNA sequencing; and M. F. Fontana for helpful comments  
1065 on the manuscript. Flow cytometry data was acquired through the University of  
1066 Washington, Cell Analysis Facility Shared Resource Lab, with NIH  
1067 award 1S10OD024979-01A1 funding for the Symphony A3. M.S.N. was supported by a  
1068 University of Washington Immunology Training Grant T32 AI106677 and by the UW  
1069 Immunology Department Titus Fellowship. Work at Columbia University was supported  
1070 by NIH R35GM143051, Sloan Foundation Fellowship, Klingenstein-Simons Fellowship  
1071 (all to A.B.). A.B. and J.v.M. are Searle Scholars. J.v.M. is a Burroughs Wellcome  
1072 Investigator in the Pathogenesis of Infectious Disease. Work at Washington University

1073 was supported by R01AI139314 (MTB) and F31AI167499 (EAK). Work at the University  
1074 of Washington was supported by NIH DP2OD024087 and R01AI167923.

1075

1076 Author contributions: MSN designed and performed experiments, analyzed data, and wrote  
1077 the paper with JVM. LMW and DLJ assisted with experiments at the University of Washington.  
1078 NN performed Tn5-tagmented whole-genome sequencing, genotype imputation for congenic  
1079 strain generation and assisted with QTL analysis, with supervision by AB. EAK performed murine  
1080 norovirus experiments and data analysis with supervision and funding provided by MTB. AB  
1081 acquired funding and provided resources for Tn5-sequencing. JVM conceived of and supervised  
1082 the study, performed experiments, analyzed data, and wrote the paper with MSN.  
1083

#### 1084 **Figure legends:**

1085 **Figure 1. Balb mice have fewer tuft cells at baseline and do not develop succinate**  
1086 **induced hyperplasia unless primed. (A and B)** (A) Representative images and (B) tuft  
1087 cell (DCLK1+) quantification by immunofluorescence from indicated tissues and  
1088 indicated mice. **(C)** Thymic tuft cell quantification by flow cytometry. **(D)** Tuft cell  
1089 quantification in the distal SI of Balb mice at indicated succinate concentrations and  
1090 time points. **(E)** Tuft cell quantification in the distal SI of adult B6 and Balb mice raised  
1091 by dams of indicated genotype and given 150mM succinate for 7 days. **(F-G)**  
1092 Experimental schematic and tuft cell quantification in the distal SI of Balb mice treated  
1093 with either (F) rIL-25 or (G) IL-4c as indicated. In the graphs, each symbol represents  
1094 an individual mouse from three or more pooled experiments. In (D and E), shaded area  
1095 indicates the 95% confidence interval of the mean for distal SI tuft cell quantification  
1096 calculated from a large cohort of control B6 mice. \* $p < 0.05$ , \*\* $p < 0.01$ , \*\*\* $p < 0.001$  by  
1097 Mann-Whitney (B and C), by one way ANOVA with comparison to B6 (D) or Balb  
1098 untreated (G) or multiple comparisons (H), and by multiple t tests (E). n.s., not  
1099 significant. Graphs depict mean +/- SEM. Also see Figure S1.

1100 **Figure 2. Balb ILC2s are equally responsive to IL-25 but less activated at baseline**  
1101 **compared to B6 ILC2s. (A and B)** Quantification of ILC2s (CD45<sup>+</sup> Lin<sup>-</sup> GATA3<sup>+</sup>) by (A)  
1102 percentage and (B) absolute number in the SILP. **(C, D and E)** Quantification of (C)  
1103 IL17RB MFI (D) CD44 MFI and (E) KLRG1 MFI on ILC2s. **(F)** IL-13 concentration in the  
1104 supernatant following 6-h *in vitro* culture of SI ILC2s with the indicated concentrations of  
1105 rIL-25 and LTC<sub>4</sub>. In the graphs, each symbol represents an individual mouse from two  
1106 pooled experiments. \* $p < 0.05$ , \*\* $p < 0.01$ , \*\*\* $p < 0.001$  by Mann-Whitney (A – D) or by  
1107 multiple t tests (E and F). n.s., not significant. Graphs depict mean +/- SEM. Also see  
1108 Figure S2.

1109 **Figure 3. Balb tuft cell defect is epithelium intrinsic and tuft cell specific. (A)**  
1110 Representative flow cytometry plots of tuft cell quantification from B6 or Balb distal SI  
1111 organoids cultured *in vitro* for one week, either untreated or rIL-13 treated (2.5 ng/ml).  
1112 **(B and C)** Quantification of tuft cells from (A) **(D and E)** Real-time PCR quantification of



1113 indicated genes normalized to B6 untreated condition, all relative to *Rps17* expression  
1114 from (D) control or (E) rIL-13 treated distal SI organoids cultured for 2 weeks *in vitro*. In  
1115 the graphs, each symbol represents a biological replicate based on the average of 2 to  
1116 3 technical replicates, from three to six pooled experiments. \* $p < 0.05$ , \*\* $p < 0.01$ , \*\*\* $p <$   
1117  $0.001$  by multiple t tests (B - E). n.s., not significant. Graphs depict mean +/- SEM. Also  
1118 see Figure S3.

1119 **Figure 4. A single locus on chromosome 9 regulates baseline tuft cell frequency**  
1120 **and succinate responsiveness.** (A) Quantification of tuft cells from distal SI of  
1121 succinate treated female mice. (B and C) QTL mapping of succinate induced tuft cell  
1122 hyperplasia in Balb X B6 F2 cross (B) whole genome and (C) zoomed in on Chr9. (D)  
1123 Effect plot of tuft cell phenotype based on genotype at the peak QTL (Chr9:50857809)  
1124 (E) Schematic of genotype for congenic Strain 1-4 mice. (F - H) (F) Representative  
1125 images and quantification of tuft cells from distal SI at (G) baseline or (H) after 150mM  
1126 succinate treatment. Some B6 and Balb data points shown in (G) and (H) are also  
1127 included as controls in Figure 1B and 1D. In (A), shaded area indicates the 95%  
1128 confidence interval of the mean for distal SI tuft cell quantification calculated from a  
1129 large cohort of control B6 mice. In the graphs, each symbol represents an individual  
1130 mouse from three or more pooled experiments. \* $p < 0.05$ , \*\* $p < 0.01$ , \*\*\* $p < 0.001$  by  
1131 one-way ANOVA (G and H) with comparison to B6. n.s., not significant. Graphs depict  
1132 mean +/- SEM. Also see Figure S4.

1133 **Figure 5. mRNA sequencing of mature tuft cells from B6, Balb and Strain 3 mice.**  
1134 (A) Hierarchical clustering of differentially expressed genes. (B) Normalized read count  
1135 of *Sucnr1*. (C) Volcano plots depicting DEGs from Strain 3 vs Balb. (D) Volcano plots  
1136 depicting DEGs for genes found in the Chr9 50-67Mb region, from Balb vs B6. (E) Plot  
1137 of fold change of DEGs from Strain 3 vs B6 compared to fold change from Balb vs B6.  
1138 (F and G) Normalized read count of (F) *Pou2af2* and (G) *Gm7293*. \* $p < 0.05$ , \*\* $p < 0.01$ ,  
1139 \*\*\* $p < 0.001$  by one-way ANOVA (B, F and G). n.s., not significant. Graphs depict mean  
1140 +/- SEM. Also see Figure S5.

1141 **Figure 6. *Pou2af2* isoform expression is modulated by genotype.** (A) Agarose gel  
1142 of 5' Rapid amplification of cDNA ends products from distal SI crypts. (B) Schematic of  
1143 *Pou2af2* isoforms expressed in distal SI crypts with annotated SNPs (vertical bars) that  
1144 differ between B6 and Balb. SNPs that also match phenotypes of other inbred strains  
1145 are highlighted in red. (C) Real-time PCR quantification of *Pou2f3*. (D) Real-time PCR  
1146 quantification of indicated *Pou2af2* isoform and *Pou2af2* isoform ratio. (E) Tuft cell  
1147 quantification in the distal SI and (F) *Pou2af2* isoform ratio calculated from real-time  
1148 PCR quantification from distal SI crypts of indicated strains. In the graphs, each symbol  
1149 represents an individual mouse three or more pooled experiments. \* $p < 0.05$ , \*\* $p < 0.01$ ,  
1150 \*\*\* $p < 0.001$  by Mann-Whitney (C), by one-way ANOVA (D and F) with comparison to  
1151 B6 and by multiple t-tests (E). n.s., not significant. Graphs depict mean +/- SEM. Also  
1152 see Figure S6.

1153  
1154 **Figure 7. Tuft cell frequency at baseline tunes the kinetics and sensitivity of the**  
1155 **tuft-ILC2 circuit.** (A) Tuft cell quantification in the distal SI and (B) protist quantification

1156 in the cecal content of *Tritrichomonas* colonized mice. (C) Tuft cell quantification in the  
1157 proximal SI and (D) worm burden in total intestine at the indicated time points post *Nb*  
1158 infection. (E) Tuft cell quantification in the proximal SI on day 12 post *Hp* infection. (F)  
1159 Overnight egg production by worms isolated from the proximal SI of mice 12 days post  
1160 *Hp* infection. (G and H) Intestinal worm burden on day 14 of (G) primary or (H)  
1161 secondary *Hp* infection 28 days after drug-cleared primary infection. (I) Mice were  
1162 pretreated with 150mM sodium succinate or 300mM sodium chloride for 1 week prior to  
1163 oral infection with murine norovirus (MNoV) CR6. Viral genome copies detected in the  
1164 distal SI 7 days after CR6 infection. Dotted line represents limit of detection (LOD). In  
1165 (A), shaded area indicates the 95% confidence interval of the mean for distal SI tuft cell  
1166 quantification calculated from a large cohort of control B6 mice. In the graphs, each  
1167 symbol represents an individual mouse from two or three pooled experiments. \* $p < 0.05$ ,  
1168 \*\* $p < 0.01$ , \*\*\* $p < 0.001$  by multiple t tests (C and D), by one-way ANOVA (A and B, E to  
1169 H) or by two way ANOVA (I). n.s., not significant. Graphs depict mean +/- SEM. Also  
1170 see Figure S7.

1171  
1172 **Supplemental Figure 1. Balb mice have fewer tuft cells at baseline and rIL-4c**  
1173 **priming leads to sex specific activation of the tuft-ILC2 circuit.** (A) Quantification of  
1174 cecal tuft cells by flow cytometry. (B) Data from Figure 1G separated by sex. In the  
1175 graphs, each symbol represents an individual mouse from two or three pooled  
1176 experiments. \* $p < 0.05$ , \*\* $p < 0.01$ , \*\*\* $p < 0.001$  by Mann-Whitney (A) or multiple t tests  
1177 (B). n.s., not significant. Graphs depict mean +/- SEM.

1178 **Supplemental Figure 2. Equivalent numbers and responses of small intestinal**  
1179 **type 2 immune cells in Balb and B6 mice.** (A) Gating strategy for identification of  
1180 ILC2s, eosinophils and GATA3<sup>+</sup> Th2s from SI lamina propria of naive mice. (B and C)  
1181 Percentage and absolute number of (B) eosinophils and (C) Th2 cells. (D) IL-5  
1182 concentration in the supernatant following 6-h *in vitro* culture of SI ILC2s with the  
1183 indicated concentrations of rIL-25 and LTC<sub>4</sub> and (E) Ki67 expression 2 days after  
1184 stimulation. In the graphs, each symbol represents an individual mouse from two pooled  
1185 experiments. \* $p < 0.05$ , \*\* $p < 0.01$ , \*\*\* $p < 0.001$  by Mann-Whitney (B and C) or by  
1186 multiple t tests (D and E). n.s., not significant. Graphs depict mean +/- SEM.

1187 **Supplemental Figure 3. Organoid analysis.** (A) Gating strategy for identification of  
1188 tuft cells from SI organoids. (B) Fold change in % tuft cells from rIL-13 treated over  
1189 untreated organoids derived from the same biological replicate. In the graphs, each  
1190 symbol represents a biological replicate based on the average of 2 to 3 technical  
1191 replicates, from three to six pooled experiments. \* $p < 0.05$ , \*\* $p < 0.01$ , \*\*\* $p < 0.001$  by  
1192 multiple t tests (B). n.s., not significant. Graphs depict mean +/- SEM.

1193 **Supplemental Figure 4. Sex effect in Balb x B6 F1 and F2 mice and recovery of**  
1194 **tuft cell abundance in Strain 3 congenic.** (A and B) Tuft cell quantification in dSI of  
1195 Balb X B6 (A) F1 and (B) F2 mice by sex. (C) Chromosome 9 QTL mapping of  
1196 succinate induced tuft cell hyperplasia in Balb X B6 F2 by sex. (D, E and F) Tuft cell  
1197 quantification in the (D) proximal SI, (E) colon and (F) trachea by immunofluorescence.  
1198 B6 and Balb data in (F) are also represented in Figure 1B. In the graphs, each symbol

1199 represents an individual mouse from three or more pooled experiments. \* $p < 0.05$ , \*\* $p <$   
1200  $0.01$ , \*\*\* $p < 0.001$  by multiple t tests (A and B) and by one-way ANOVA (D, E and F).  
1201 n.s., not significant. Graphs depict mean +/- SEM.

1202 **Supplemental Figure 5. mRNA sequencing of mature tuft cells from B6, Balb and**  
1203 **Strain 3 mice. (A)** Unsupervised PCA of gene expression. **(B and C)** Volcano plots of  
1204 (B) Balb vs B6 and (C) Congenic vs B6. The samples in this figure were all analyzed in  
1205 one sequencing run.

1206 **Supplemental Figure 6. *Pou2af3* isoform expression follows similar pattern as**  
1207 ***Pou2af2*. (A)** Real-time PCR quantification of indicated genes/isoforms normalized to  
1208 *Rps17* (housekeeping gene) from distal SI crypts. **(B)** *Pou2af3* isoform expression  
1209 normalized to B6 and **(C)** *Pou2af3* isoform ratios. **(D)** Real-time PCR quantification of  
1210 indicated genes normalized to B6. **(E)** Tuft cell quantification in dSI of Swiss Webster  
1211 mice. **(F)** *Pou2af3* isoform ratios from indicated strains. **(G)** Depiction of SNP  
1212 rs29595736 in *Pou2af2* isoforms and translated protein. In the graphs, each symbol  
1213 represents an individual mouse from two or three pooled experiments. \* $p < 0.05$ , \*\* $p <$   
1214  $0.01$ , \*\*\* $p < 0.001$  by one-way ANOVA (B, C and F) with comparison to B6 and by  
1215 multiple t tests (D). Graphs depict mean +/- SEM.

1216  
1217 **Supplemental Figure 7. Tuft cell frequency at baseline tunes the kinetics and**  
1218 **sensitivity of the tuft-ILC2 circuit. (A)** Tuft cell quantification in the distal SI at the  
1219 indicated time points post *Nb* infection. **(B and C)** Eggs per gram feces quantified from  
1220 mice (B) 12 days post primary *Hp* infection or (C) 14 days post challenge *Hp* infection.  
1221 **(D)** Mice were pretreated with 150mM sodium succinate or 300mM sodium chloride for  
1222 1 week prior to oral infection with murine norovirus (MNoV) CR6. Viral genome copies  
1223 detected in the colon 7 days after CR6 infection. Dotted line represents limit of detection  
1224 (LOD). In the graphs, each symbol represents an individual mouse from two pooled  
1225 experiments. \* $p < 0.05$ , \*\* $p < 0.01$ , \*\*\* $p < 0.001$  by multiple t tests (A), by one-way  
1226 ANOVA (B-C) and by two-way ANOVA (D). n.s., not significant. Graphs depict mean +/-  
1227 SEM.

# Supplemental Figure 1

bioRxiv preprint doi: <https://doi.org/10.1101/2022.10.19.512785>; this version posted October 21, 2022. The copyright holder for this preprint (which was not certified by peer review) is the author/funder, who has granted bioRxiv a license to display the preprint in perpetuity. It is made available under aCC-BY-NC-ND 4.0 International license.

## A

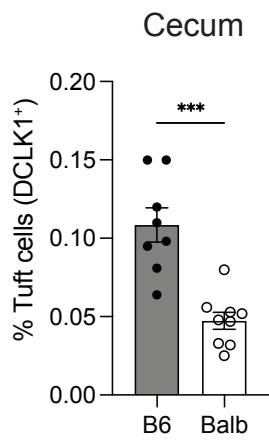

## B

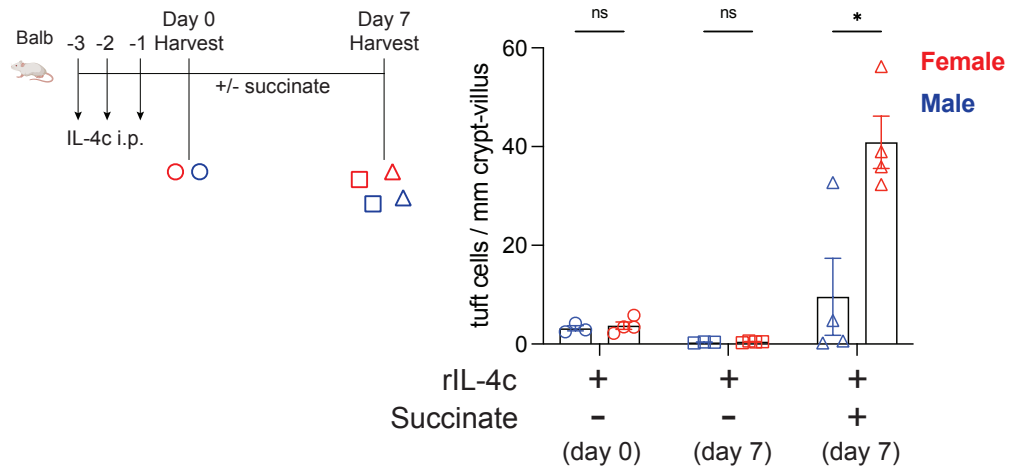

**A**

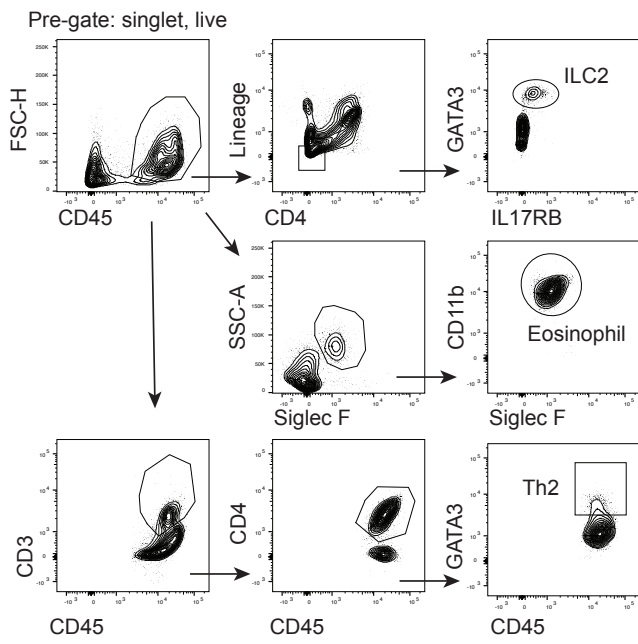

**B**

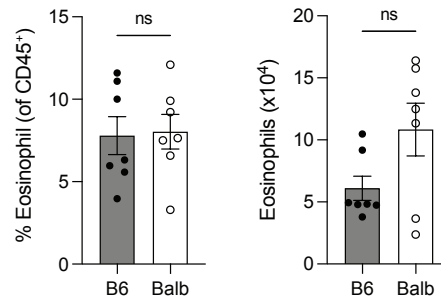

**C**

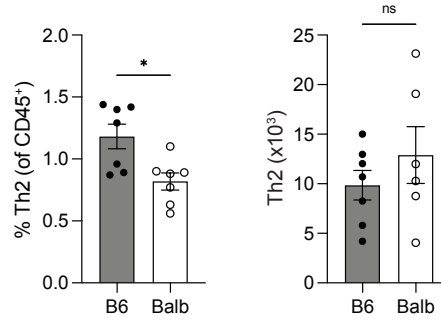

**D**

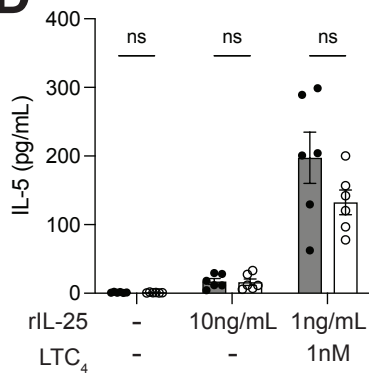

**E**

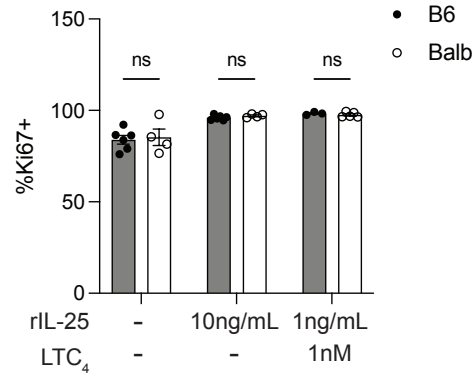

**A**

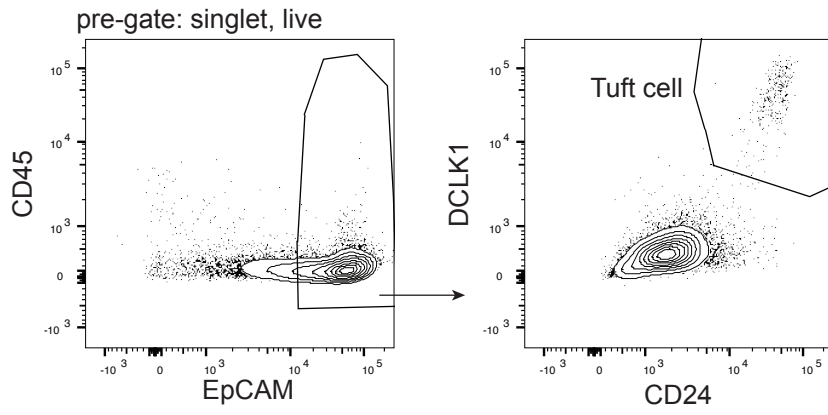

**B**

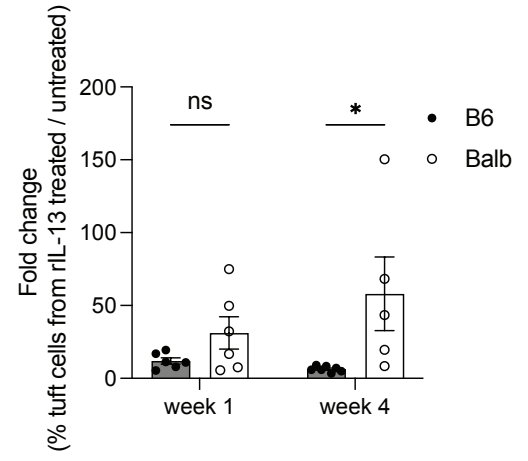

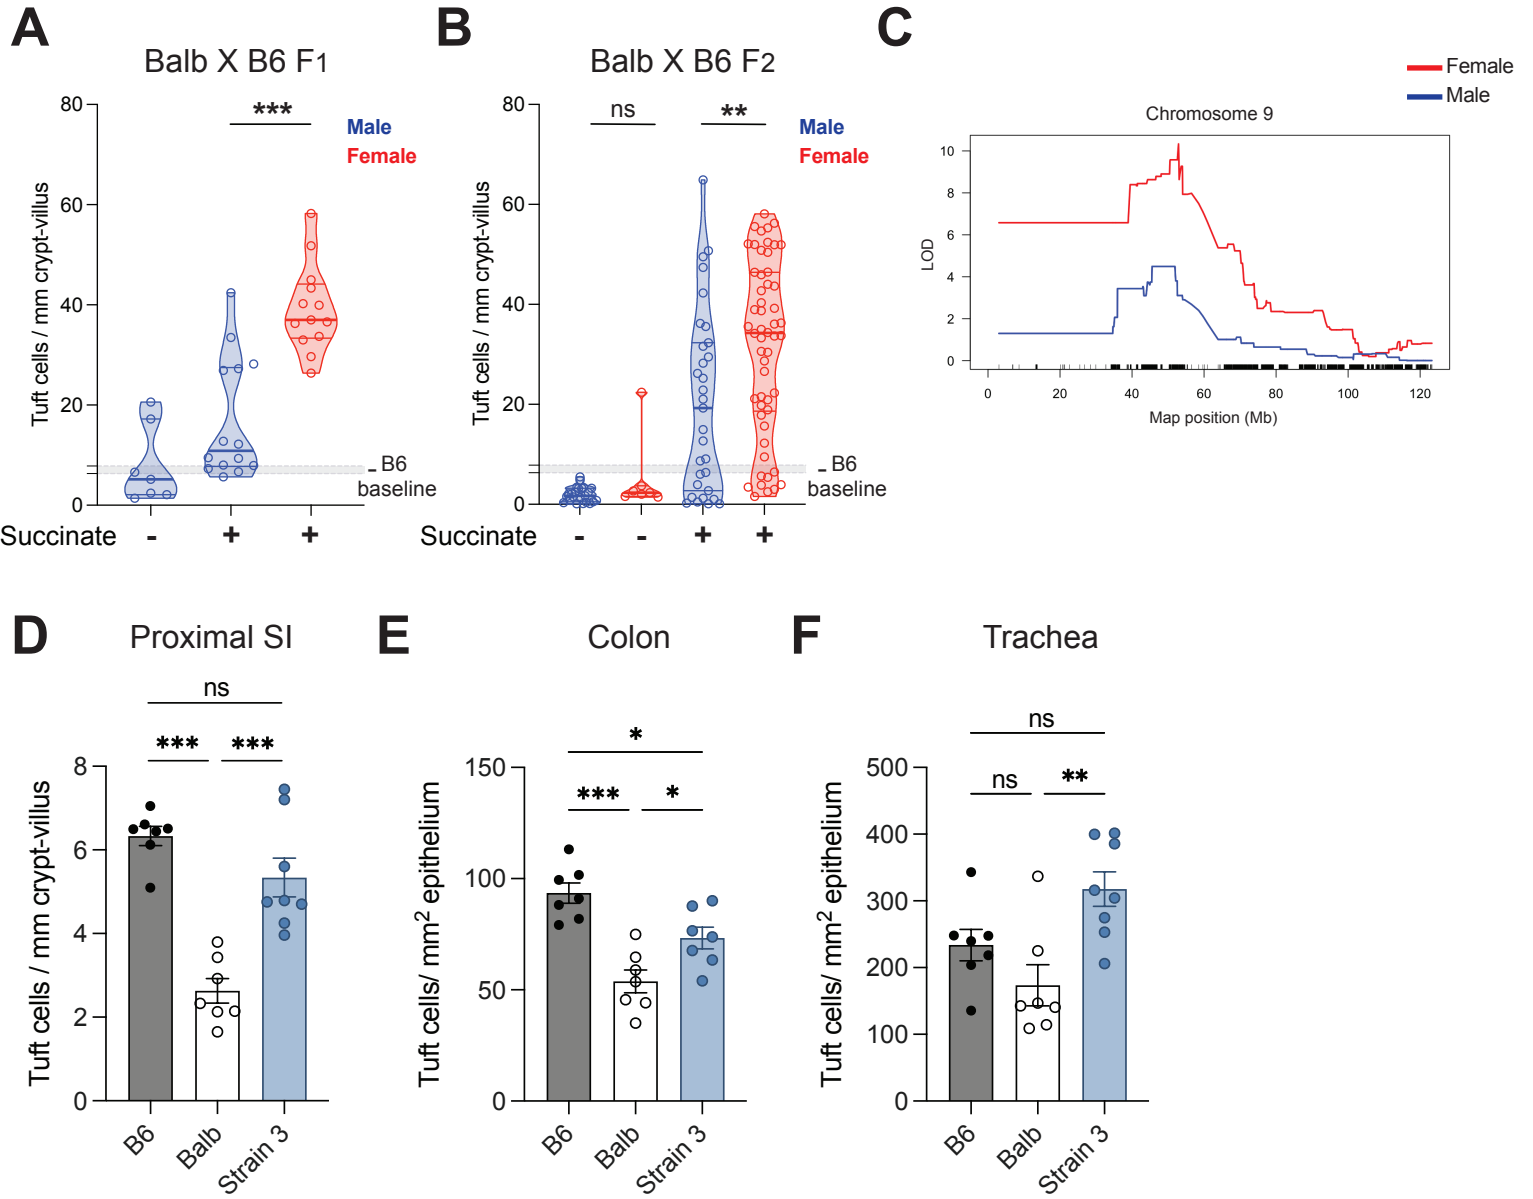

**A**

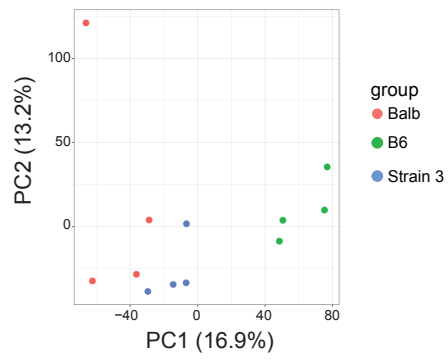

**B**

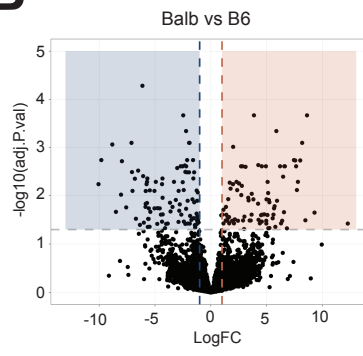

**C**

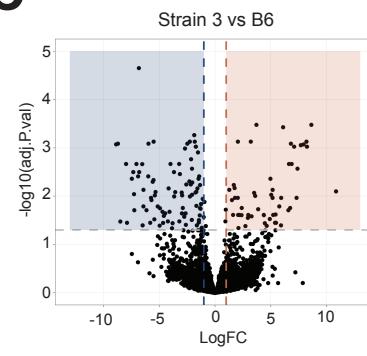



**A**

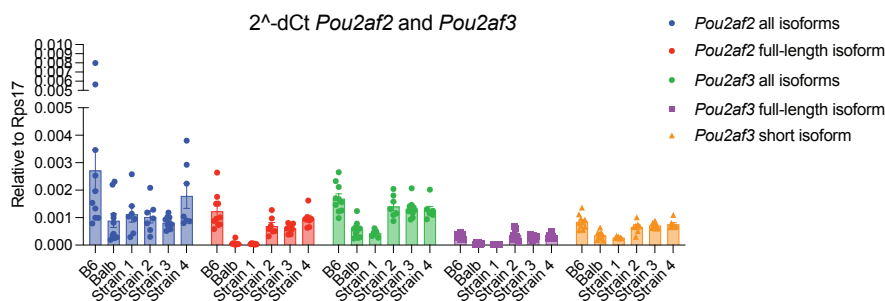

**B**

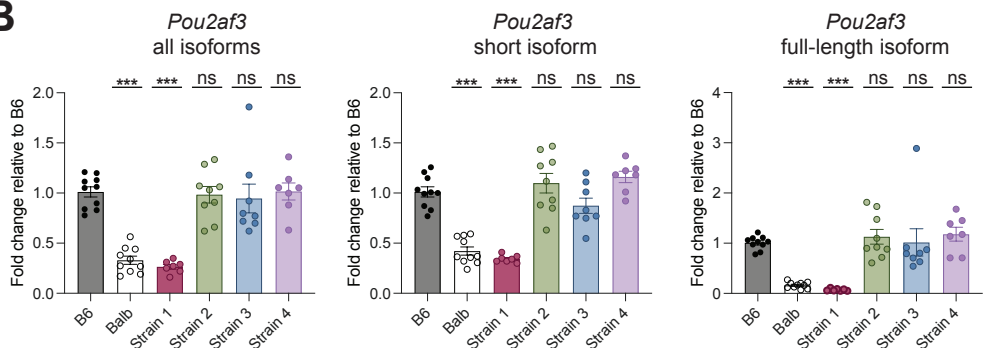

**C**

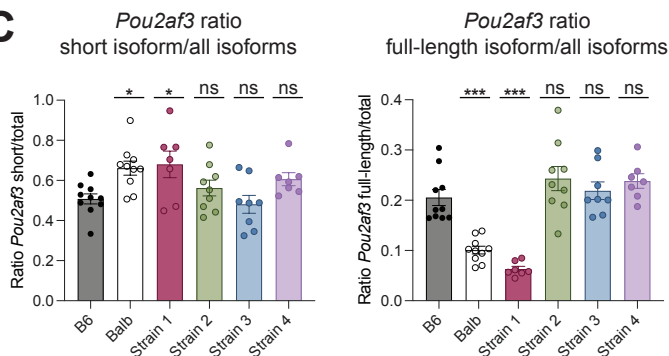

**D**

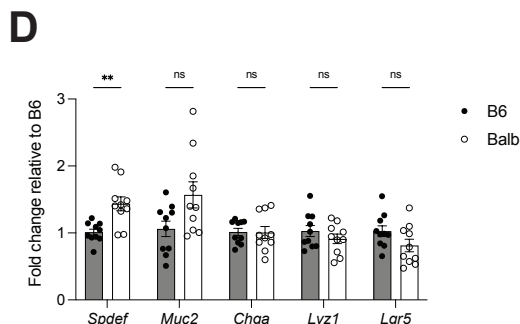

**E**

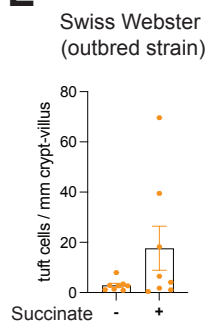

**F**

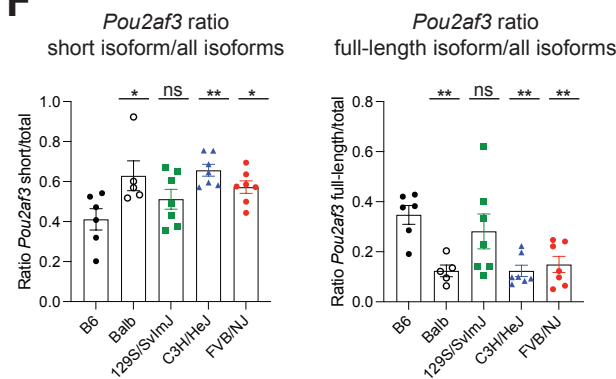

**G**

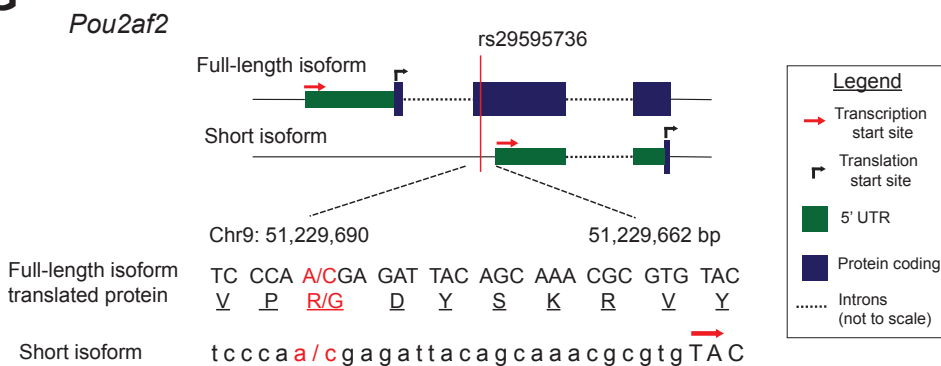

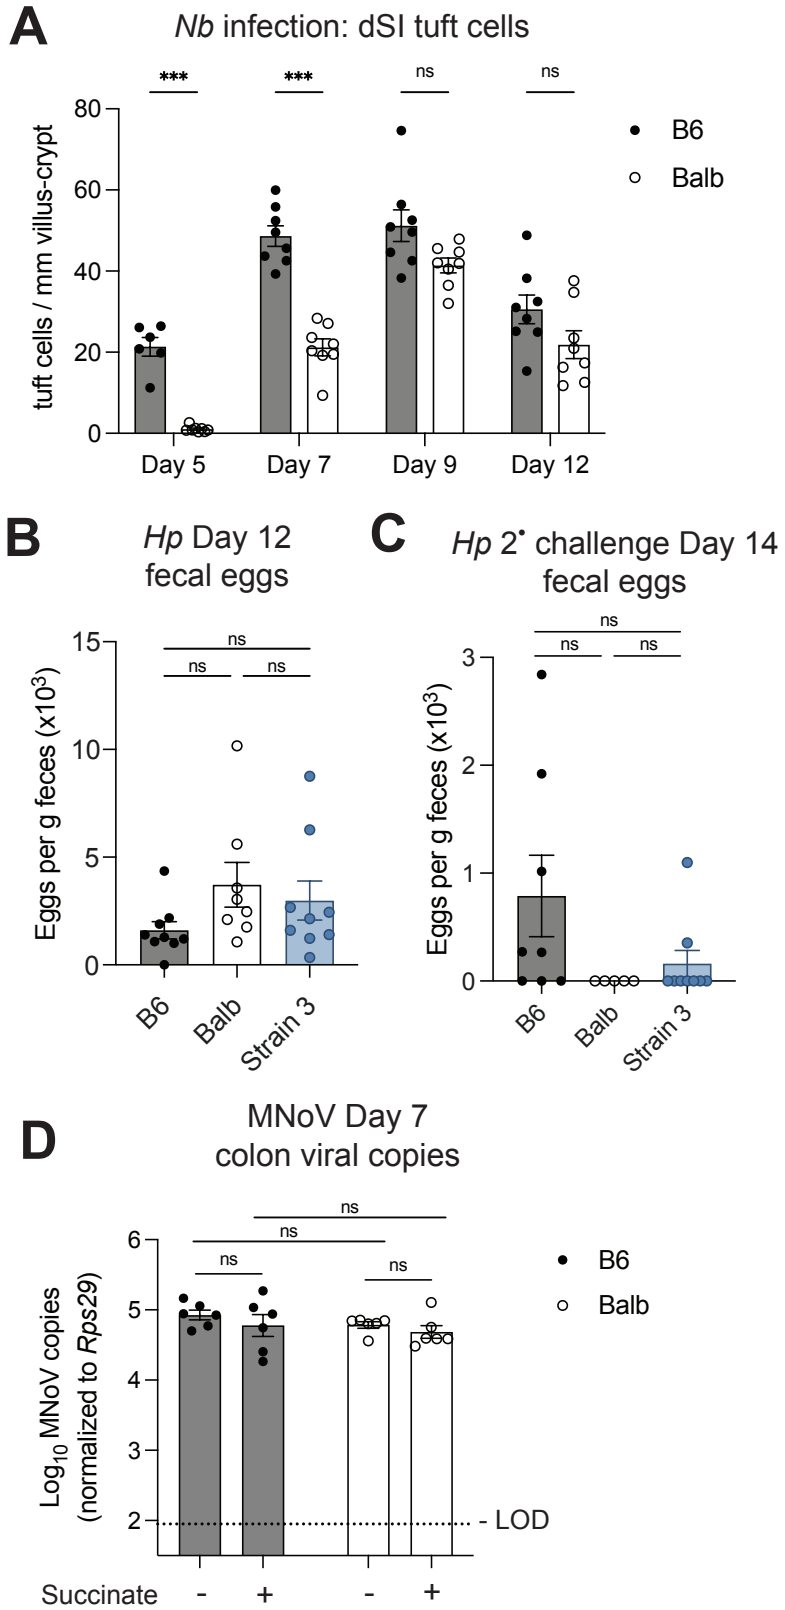

Source: https://www.biorxiv.org/content/10.1101/2022.10.19.512785v1.full.pdf
